# Supplementary material for: TKI-addicted ROS1-rearranged cells are destined to survival or death by the intensity of ROS1 kinase activity
Source: PubMed Central journal article supplement (PMC5514057; doi:10.1038/s41598-017-05736-9), 2017-07-17
Supplement: 41598_2017_5736_MOESM1_ESM.pdf [file 41598_2017_5736_MOESM1_ESM.pdf]

## **Supplementary Information**

# **TKI-addicted ROS1-rearranged cells are destined to survival or death by the intensity of ROS1 kinase activity**

**Hayato Ogura<sup>1,2</sup>, Yuka Nagatake-Kobayashi<sup>1,2</sup>, Jun Adachi<sup>3</sup>, Takeshi Tomonaga<sup>3</sup>, Naoya Fujita<sup>1,2</sup>, Ryohei Katayama<sup>1\*</sup>**

<sup>1</sup> Division of Experimental Chemotherapy, Cancer Chemotherapy Center, Japanese Foundation for Cancer Research, Tokyo 135-8550, JAPAN.

<sup>2</sup> Department of Computational Biology and Medical Sciences, Graduate School of Frontier Sciences, The University of Tokyo, Tokyo 108-8639, JAPAN.

<sup>3</sup> Laboratory of Proteome Research, National Institute of Biomedical Innovation, Health and Nutrition, Osaka 567-0085, JAPAN.

### **\*Corresponding author**

**Ryohei Katayama**

Cancer Chemotherapy Center, Japanese Foundation for Cancer Research, 3-8-31, Ariake, Koto-ku, Tokyo 135-8550, JAPAN

Phone: +81-3-3520-0111; Fax: +81-3-3570-0484; E-mail: ryohei.katayama@jfcr.or.jp.

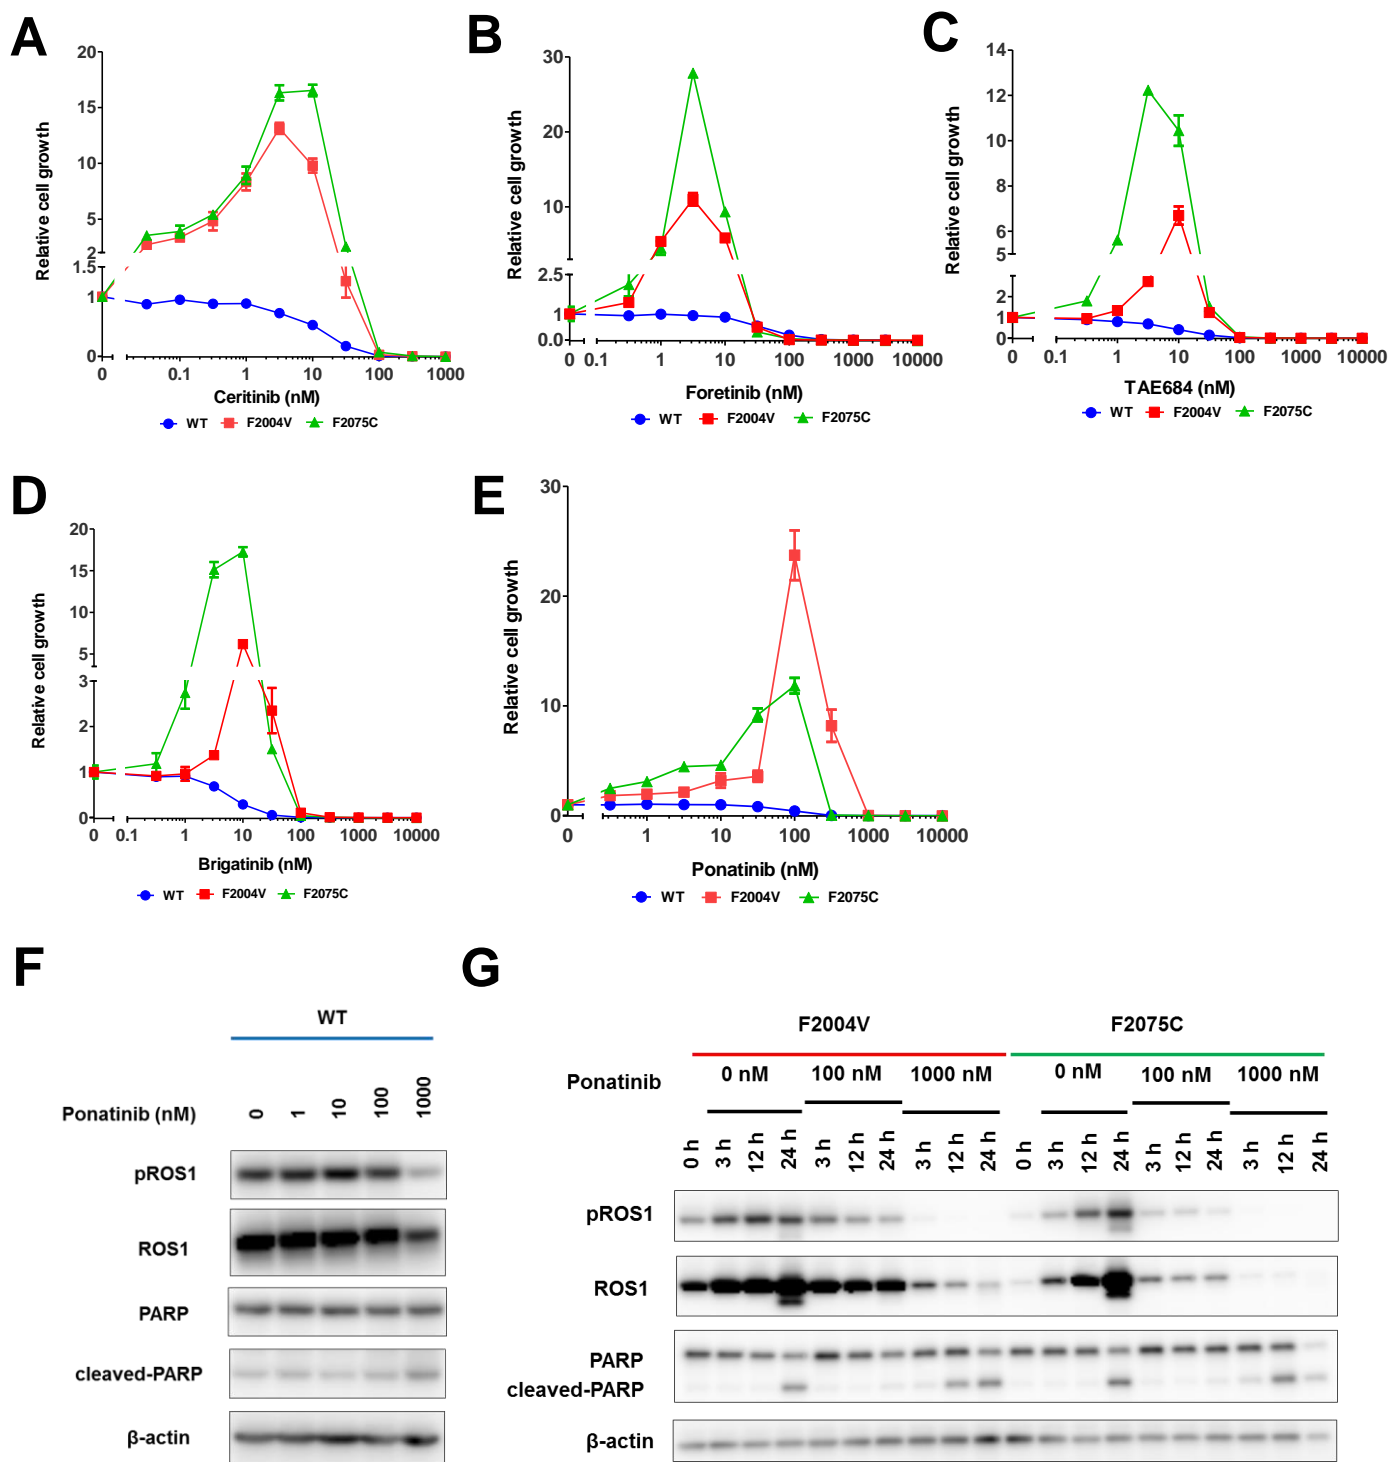

**Supplementary figure S1. Sensitivity of wild-type CD74-ROS1, F2004V- or F2075C-mutant cells to ROS1- TKIs or multi-targeted TKIs.**

Sensitivity to ceritinib (A), foretinib (B), TAE684 (C), brigatinib (D), or ponatinib (E) of Ba/F3 cells expressing wild-type, F2004V- or F2075C-mutated CD74-ROS1. Each cell line was treated with the indicated dose ranges of inhibitors for 72 h, then cell viability was measured by the CellTiter-Glo assay. Each value was normalised with the value from the untreated cells. (F, G) Immunoblotting for wild-type, F2004V- or F2075C-mutated cells with ponatinib at the indicated concentrations (F; for 3 h, G; for the indicated time point). F2004V- or F2075C-mutated cells at 0 h was treated with 10 nM of cabozantinib. Cell lysates were immunoblotted to detect the indicated proteins.

**A****Cabozantinib 10 nM****Cabozantinib 0 nM**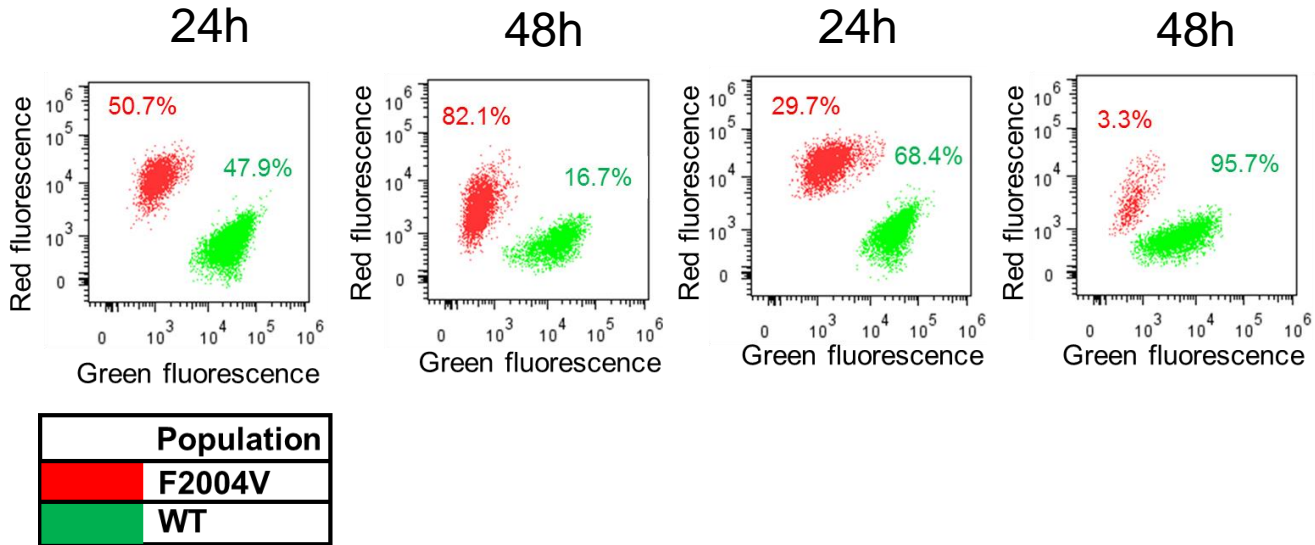**B****Cabozantinib 10 nM****Cabozantinib 0 nM**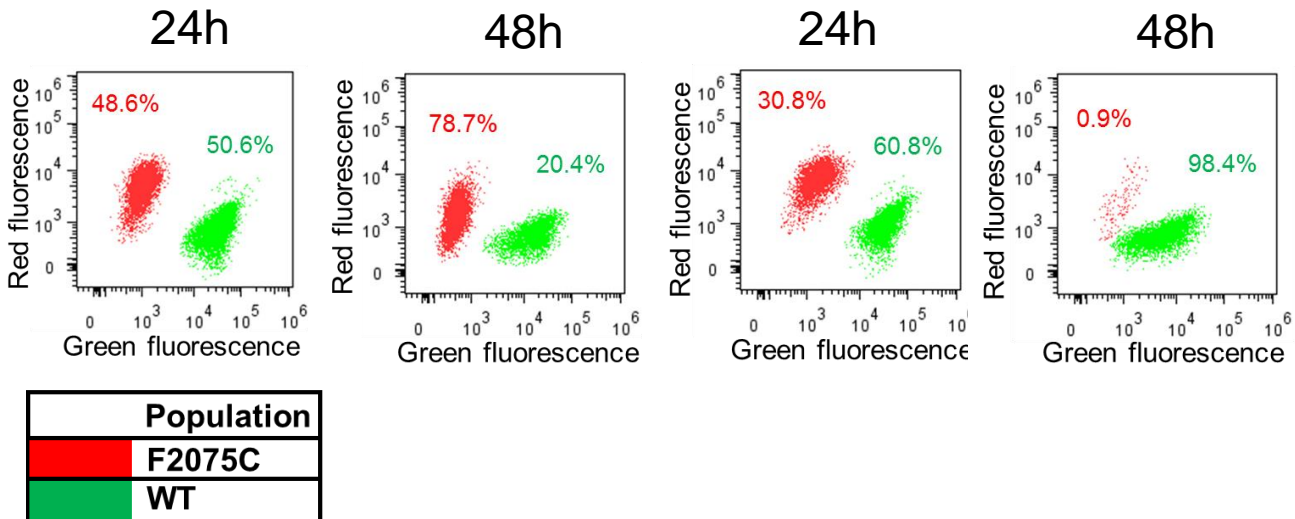

**Supplementary figure S2. Dot plot of flow cytometry to evaluate proportions of cells expressing wild-type, F2004V- or F2075C-mutated CD74-ROS1.**

(A, B) Dot plot of flow cytometry for cells expressing wild-type, F2004V- (A) or F2075C- (B) mutated CD74-ROS1 in the presence of 0 or 10 nM cabozantinib for 24 or 48 h. F2004V- or F2075C-mutated cells were stained with red (PKH26) and WT with green (PKH67) fluorescent dye.

**A**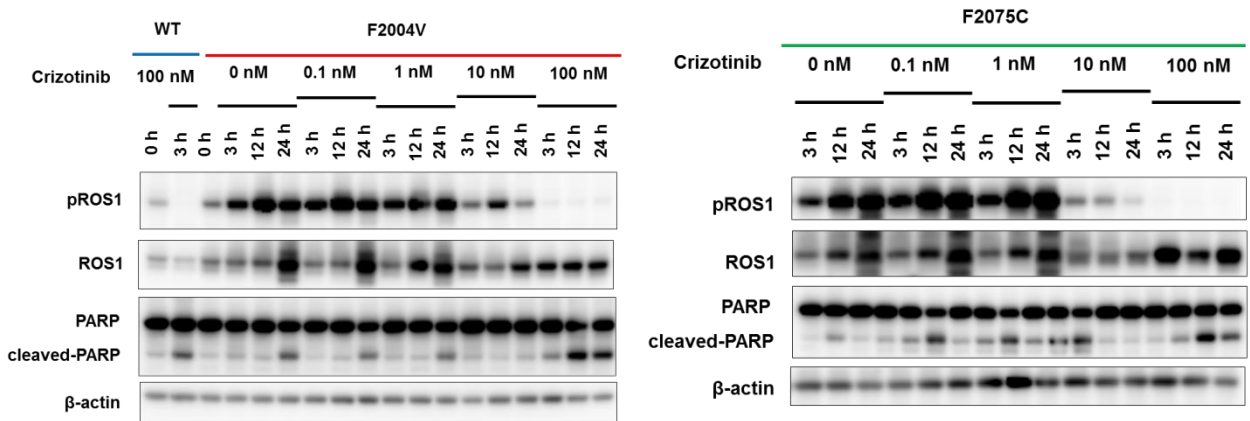**B**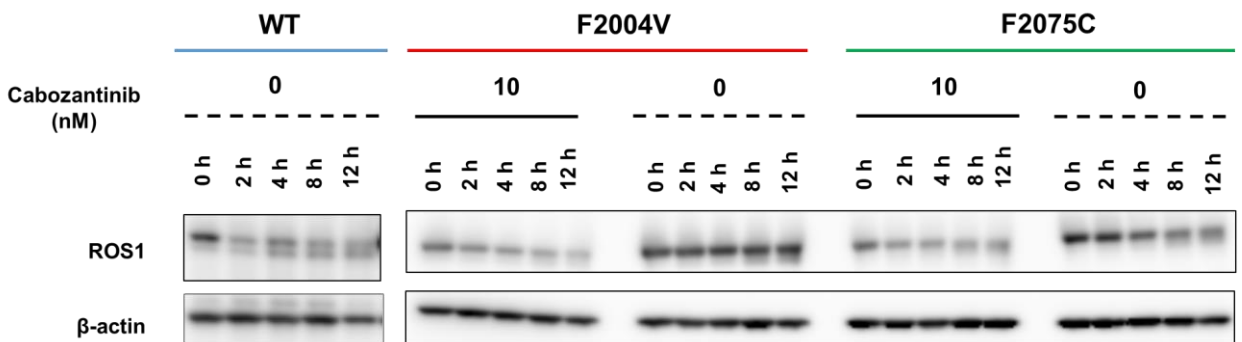

**Supplementary figure S3. Crizotinib dependency and ROS1 protein stability in cells expressing wild-type, F2004V- or F2075C-mutated CD74-ROS1.**

(A) Immunoblotting of cabozantinib-treated F2004V- or F2075C-mutated cells at the indicated concentrations or crizotinib-treated (100 nM) wild-type CD74-ROS1 cells. Cell lysates were immunoblotted to detect the indicated proteins. (B) Immunoblotting for untreated or cabozantinib-treated wild-type CD74-ROS1, F2004V- or F2075C-mutated cells. Each sample was treated with 100  $\mu$ M of cycloheximide (CHX). F2004V- or F2075C-mutated cells were pretreated with CHX for 3 h prior to removal of cabozantinib.

**A**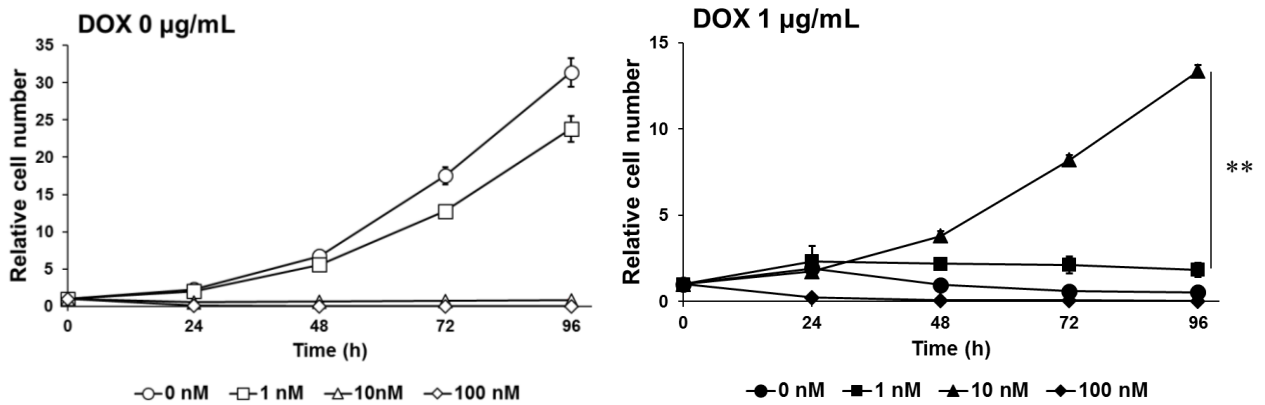**B**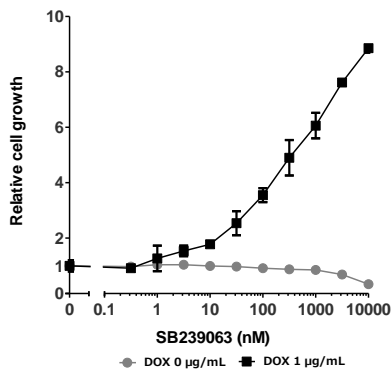**C**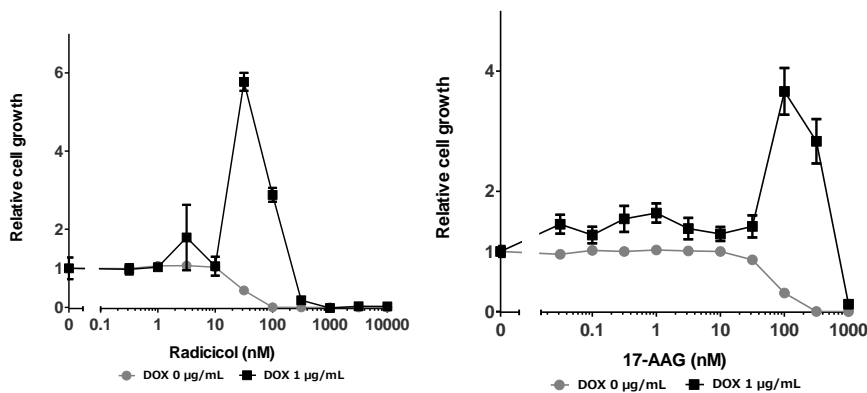

**Supplementary Figure S4. Reconstructed Ba/F3 cells conditionally over-expressing F2075C-mutated CD74-ROS1 show characteristics of ROS1-TKI addiction.**

(A) Cell growth of the reconstructed F2075C-mutated cells with (left) or without (right) 1 µg/mL DOX with each concentration of cabozantinib as measured by CellTiter-Glo assay. Relative cell numbers are indicated by normalizing viability of each cell line with corresponding values at 0 h. Statistical significance was calculated by a *t* test; \*\* indicates  $p < 0.001$ .

(B, C) Sensitivity to SB239063 (B), radicicol (C, left) or 17-AAG (C, right) of reconstructed F2075C-mutated cells. Each the reconstructed F2075C-mutated cell lines with or without 1 µg/mL DOX was treated with the indicated concentrations of inhibitors for 72 h, then cell viability was measured by the CellTiter-Glo assay. Each value was normalised with the value from untreated cells.

| Color of bins |          |
|---------------|----------|
|               | pS/pT/pY |
|               | pY       |

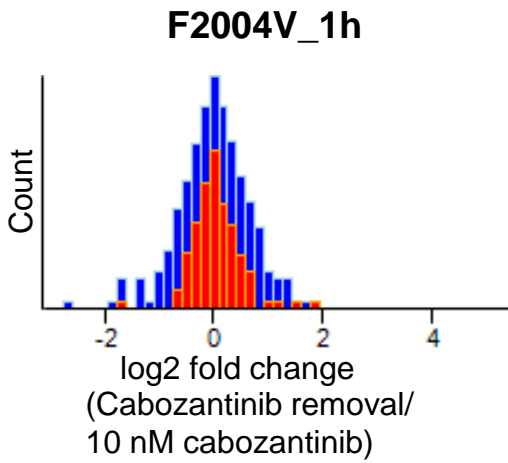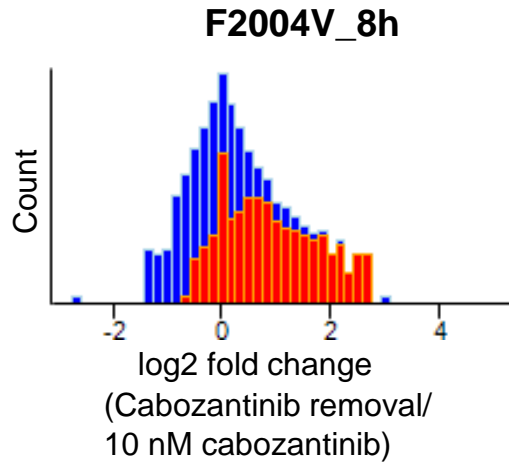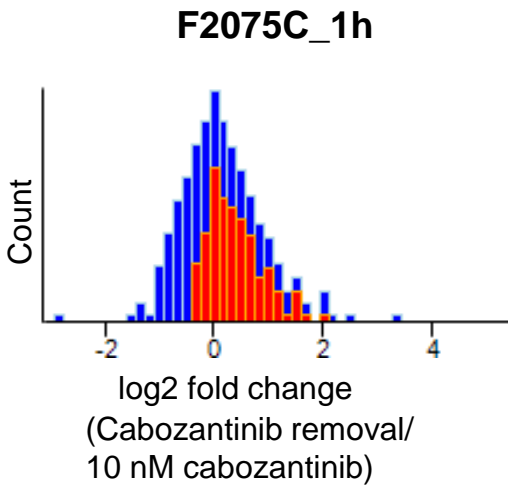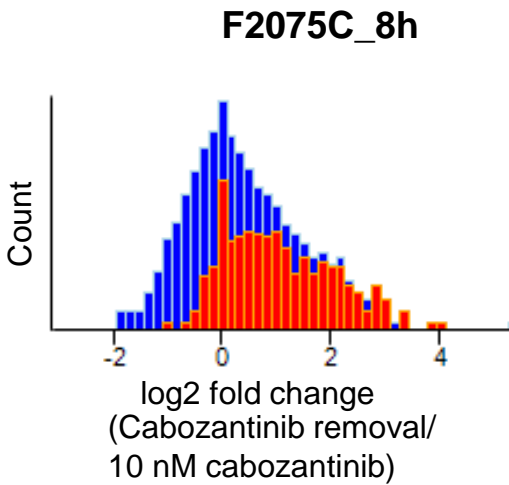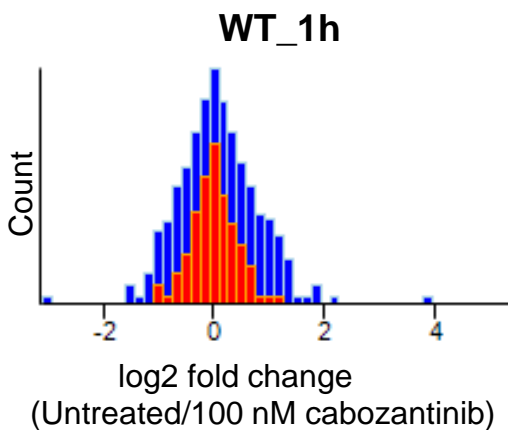

**Supplementary Figure S5. Distribution of phosphorylated tyrosine peptides in histograms from phosphoproteomic analysis.**

Histograms showing distributions of total peptides depicted as blue bins, and phosphorylated tyrosine (pY) peptides depicted as orange bins. Each value is shown as the mean of two independent experiments.

**A**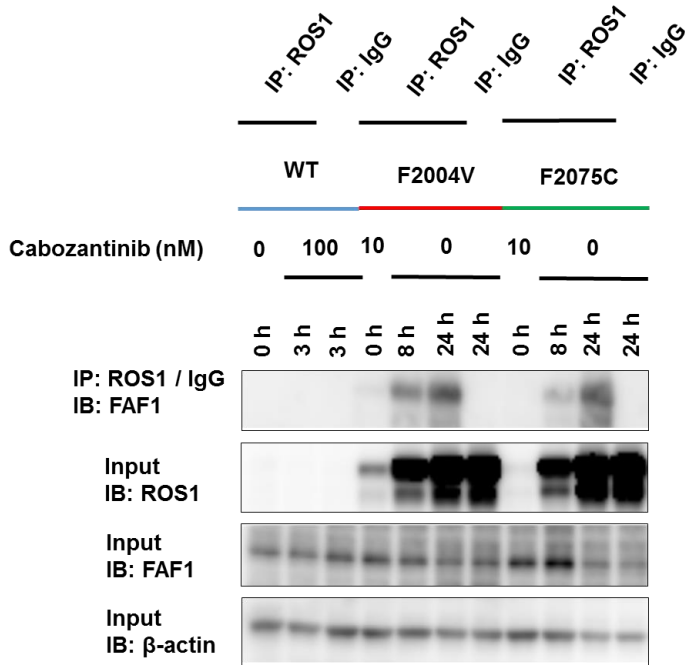**B**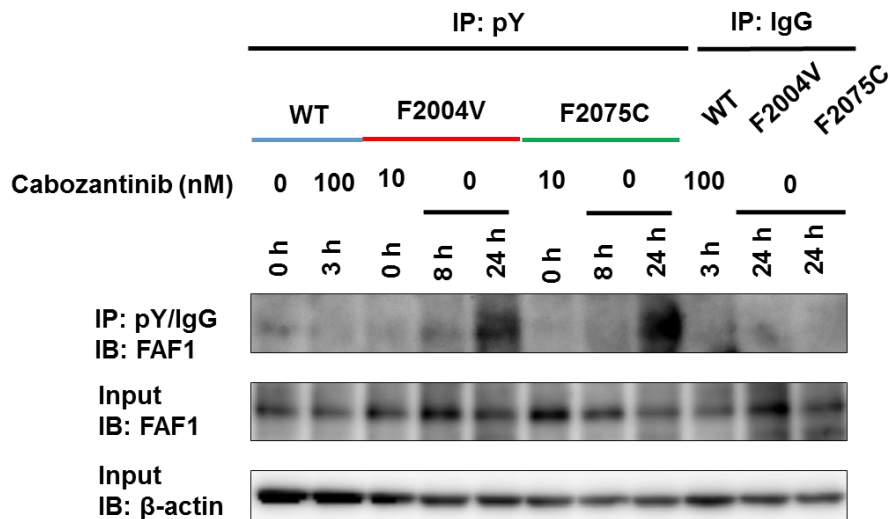

**Supplementary Figure S6. ROS1-kinase phosphorylates tyrosine-phosphosites of FAF1.**

(A, B) Immunoprecipitation (IP) was performed for wild-type CD74-ROS1, F2004V- or F2075C-mutated cells. The immunoprecipitated lysates were by immunoblot (IB) to detect the indicated proteins. IgG was used as a negative control. (A) Cell lysates immunoprecipitated with anti-ROS1 antibody. (B) Cell lysates immunoprecipitated with anti-phosphotyrosine antibody.

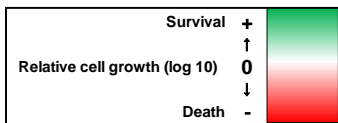

| Target                             | Compound               | WT      |          |         |         | F2004V  |         |         |         | F2075C  |         |         |         |        |      |      |
|------------------------------------|------------------------|---------|----------|---------|---------|---------|---------|---------|---------|---------|---------|---------|---------|--------|------|------|
|                                    |                        | 0       | 10 nM    | 100 nM  | 1 μM    | 3 μM    | 0       | 10 nM   | 100 nM  | 1 μM    | 3 μM    | 0       | 10 nM   | 100 nM | 1 μM | 3 μM |
| None (control)                     | DMSO                   | 0       | 0        | 0       | 0       | 0       | 0       | 0       | 0       | 0       | 0       | 0       | 0       | 0      | 0    | 0    |
| antitumor (thymidylate synthetase) | 5-FU                   | -0.0002 | 0.0188   | -0.5533 | -2.2962 | -0.0644 | 0.0496  | -0.9801 | -1.9155 | -0.0394 | -0.0369 | -0.8402 | -2.2880 |        |      |      |
| antitumor (aminopeptidase B)       | Bestatin               | 0.0177  | 0.0457   | 0.0014  | -0.0087 | -0.0742 | 0.0096  | -0.3118 | -0.3637 | -0.0573 | -0.1618 | -0.4646 | -0.5305 |        |      |      |
| antitumor (DNA)                    | Bleomycin sulfate      | 0.0289  | -0.0093  | -0.1122 | -0.4502 | -0.1407 | 0.0243  | -0.0983 | -0.3365 | -0.0093 | 0.0567  | -0.1926 | -0.7023 |        |      |      |
| antitumor (DNA)                    | Cisplatin              | 0.0005  | 0.0119   | 0.0628  | 0.0798  | -0.2176 | 0.0157  | 0.0332  | -0.0940 | 0.0246  | 0.0598  | -0.1445 | -0.0192 |        |      |      |
| antitumor (DHFR)                   | Methotrexate           | -0.0645 | -0.3923  | -1.0620 | -1.1119 | -0.1454 | -0.4120 | -1.3752 | -1.4384 | -0.0132 | -0.7933 | -1.7357 | -1.7504 |        |      |      |
| antitumor (DNA)                    | Mitomycin C            | -0.0704 | -0.3680  | -2.0284 | -2.3996 | -0.2130 | -0.0972 | -0.8031 | -1.3060 | -0.0334 | -0.1674 | -1.8679 | -2.3190 |        |      |      |
| antitumor (tubulin)                | Vinblastine sulfate    | -2.1666 | -2.3452  | -2.4595 | -2.4505 | -1.7126 | -2.0086 | -2.1676 | -2.1018 | -0.1483 | -2.2417 | -2.5118 | -2.4716 |        |      |      |
| antitumor (tubulin)                | Paclitaxel             | -1.9705 | -2.0163  | -1.8658 | -1.4595 | -1.4957 | -1.4493 | -1.4600 | -1.4317 | -2.0270 | -2.0956 | -2.0933 | -1.9545 |        |      |      |
| antitumor (AR)                     | Flutamide              | 0.0625  | 0.0801   | 0.0764  | 0.1048  | -0.1424 | 0.0563  | 0.0195  | -0.1162 | 0.0299  | 0.0398  | -0.0361 | -0.0380 |        |      |      |
| antitumor (DNA)                    | Daurorubicin, HCl      | -0.3956 | -2.0876  | -2.2398 | -2.2828 | -0.2459 | -1.8573 | -2.1899 | -2.2268 | -0.0270 | -2.1345 | -2.3477 | -2.3190 |        |      |      |
| antitumor (DNA)                    | Doxorubicin, HCl       | 0.0508  | -0.2034  | -1.7348 | -2.1582 | -0.1205 | -0.0992 | -1.4156 | -1.9692 | -0.0073 | -0.5063 | -2.2227 | -2.2002 |        |      |      |
| antitumor (RNA)                    | Tamoxifen, citrate     | 0.0390  | 0.0645   | 0.0942  | 0.0877  | -0.2351 | 0.0119  | -0.0083 | -0.0916 | -0.0005 | -0.0830 | -0.1440 | -0.1483 |        |      |      |
| antitumor (ER)                     | Actinomycin D          | -2.0126 | -2.0917  | -2.2243 | -2.2321 | -1.7762 | -1.5437 | -1.9372 | -2.1340 | -2.0186 | -1.9279 | -2.2807 | -2.2880 |        |      |      |
| antitumor (topo I)                 | Camptothecin           | -0.0435 | -0.8051  | -2.2526 | -2.2561 | -0.2218 | -0.3350 | -1.7784 | -2.1018 | -0.0907 | -0.9662 | -2.3899 | -2.3354 |        |      |      |
| antitumor (topo II)                | Acclarubicin           | -0.0164 | -2.2477  | -2.3588 | -2.3602 | -0.3528 | -1.6329 | -1.5144 | -2.1176 | -0.0932 | -2.1848 | -2.4673 | -2.3354 |        |      |      |
| antitumor (topo II)                | Etoposide (VP-16)      | 0.0586  | 0.0288   | -1.6286 | -2.1910 | -0.2154 | 0.0566  | -0.7749 | -0.9310 | -0.1312 | -0.0655 | -1.9370 | -2.2661 |        |      |      |
| actin filament                     | Cytochalasin D         | 0.0807  | -0.0331  | -1.3222 | -1.1554 | -0.1325 | -0.2575 | -1.6235 | -1.8086 | -0.0281 | -0.1402 | -1.9247 | -2.1069 |        |      |      |
| adenylcyclase                      | 2',5'-dideoxyadenosine | -0.0171 | 0.0935   | 0.0611  | 0.1116  | -0.1742 | 0.0507  | -0.0295 | -0.1542 | -0.0465 | -0.0331 | -0.1275 | -0.0603 |        |      |      |
| AKT                                | AKT inhibitor          | 0.0806  | 0.0876   | 0.0886  | 0.1021  | -0.1553 | -0.0314 | -0.0091 | -0.0373 | -0.0471 | -0.0276 | -0.1143 | -0.0092 |        |      |      |
| AKT                                | NL-71-101              | 0.0631  | 0.1021   | 0.0765  | 0.0921  | -0.1691 | 0.0566  | -0.0274 | -0.1661 | -0.0877 | -0.0165 | -0.1411 | -0.0458 |        |      |      |
| Bcr-Abl                            | AG957                  | 0.0565  | 0.0770   | 0.0664  | 0.0992  | -0.1516 | -0.0228 | -0.0257 | -0.0488 | -0.0900 | -0.0364 | -0.1058 | 0.0191  |        |      |      |
| CAMKII                             | KN93                   | 0.0593  | 0.0613   | 0.0491  | -0.0456 | -0.2438 | -0.0252 | -0.0537 | 0.1044  | -0.0603 | 0.0197  | -0.1734 | -0.1634 |        |      |      |
| caspace                            | Z-VAD-FMK              | 0.0420  | 0.0506   | -0.0035 | 0.0262  | -0.2299 | -0.0882 | -0.1620 | -0.3065 | -0.0510 | 0.0018  | -0.3963 | -0.5724 |        |      |      |
| CDC2                               | Kenpaullone            | 0.0379  | 0.0549   | 0.0786  | 0.1200  | -0.1689 | 0.0225  | -0.1742 | -0.2272 | -0.1181 | 0.0252  | -0.1834 | -0.0575 |        |      |      |
| CDK2                               | Purvalanol A           | 0.0709  | 0.0707   | 0.0841  | -0.0594 | -0.1319 | 0.0004  | -0.0196 | -0.3023 | -0.0507 | 0.0023  | -0.1223 | -0.1049 |        |      |      |
| CDK4                               | 3-ATA                  | 0.0471  | 0.0981   | 0.0574  | -0.1066 | -0.1552 | 0.0160  | 0.0844  | -0.1223 | -0.0697 | 0.0296  | -0.1168 | -0.2894 |        |      |      |
| CDKs                               | Olmoucine              | 0.0893  | 0.0930   | 0.1017  | 0.1269  | -0.1839 | 0.0405  | 0.0185  | -0.0844 | -0.0589 | -0.0069 | -0.0350 | 0.0620  |        |      |      |
| CKII                               | TBB                    | 0.0177  | 0.0753   | 0.1097  | 0.1203  | -0.1633 | 0.0812  | -0.0428 | -0.1014 | -0.0560 | -0.0597 | -0.1100 | -0.0165 |        |      |      |
| COX-1                              | Sulindac sulfide       | 0.0308  | 0.0696   | 0.0938  | 0.0978  | -0.1998 | 0.0864  | -0.0742 | -0.1215 | -0.0812 | 0.0110  | -0.0555 | -0.0122 |        |      |      |
| COX-1                              | Valeryl salicylate     | 0.0304  | 0.0653   | 0.0956  | 0.1100  | -0.3026 | 0.0278  | 0.0294  | -0.1310 | -0.0951 | 0.0261  | -0.1908 | -0.0844 |        |      |      |
| COX-2                              | NS-398                 | 0.0202  | 0.0490   | 0.0448  | 0.0525  | -0.2463 | -0.0572 | -0.0271 | -0.1043 | -0.1651 | 0.0140  | -0.2734 | -0.1321 |        |      |      |
| COX                                | Sodium salicylate      | 0.0036  | 0.0710   | 0.0628  | 0.0821  | -0.2488 | 0.0919  | 0.0796  | -0.0574 | -0.0532 | 0.0501  | -0.0918 | -0.1220 |        |      |      |
| cyclicphosphodiesterase            | Theophylline           | 0.0851  | -0.0838  | 0.1085  | 0.0597  | -0.1548 | 0.0504  | -0.0028 | -0.0414 | -0.0335 | -0.0203 | -0.0561 | 0.0354  |        |      |      |
| DNA methyltransferase              | Azacytidine            | 0.0543  | 0.0789   | -0.1169 | -0.2402 | -0.1581 | -0.0305 | -0.5115 | -0.7178 | -0.0766 | -0.0176 | -0.8463 | -0.8514 |        |      |      |
| DNA polymerase                     | Aphidicolin            | 0.0994  | -0.0241  | -1.0794 | -1.7721 | -0.1859 | -0.0651 | -0.6471 | -0.7002 | -0.0798 | -0.1731 | -1.2877 | -1.3321 |        |      |      |
| EGFR                               | AG1478                 | 0.0736  | 0.1022   | 0.1117  | 0.0620  | -0.1523 | 0.0695  | 0.2793  | 0.6027  | -0.1084 | 0.0005  | 0.1747  | 0.6123  |        |      |      |
| EGFR, topol                        | Genistein              | 0.0384  | 0.0796   | 0.0643  | 0.0972  | -0.2509 | 0.0090  | -0.1054 | -0.2473 | -0.1501 | 0.0203  | -0.1873 | -0.2206 |        |      |      |
| farnesyltransferase                | Manumycin A            | 0.0521  | 0.0633   | 0.0596  | -0.0130 | -0.2631 | -0.0048 | -0.1425 | -0.4602 | -0.1246 | -0.0395 | -0.1717 | -0.6559 |        |      |      |
| farnesyltransferase                | FTI-276                | 0.0365  | 0.0489   | 0.0450  | 0.0516  | -0.2291 | -0.0155 | -0.0881 | -0.1031 | -0.1745 | 0.0390  | -0.1987 | -0.0934 |        |      |      |
| Flk-1                              | SU1498                 | 0.0791  | 0.0901   | 0.0397  | 0.0409  | -0.1278 | 0.0470  | 0.0464  | 0.0435  | -0.0925 | 0.0190  | -0.0653 | -0.0074 |        |      |      |
| geranylgeranyltransferase I        | DGT-286                | 0.0975  | 0.0835   | 0.0881  | 0.1114  | -0.1323 | 0.0260  | -0.0756 | -0.0227 | -0.1173 | -0.0022 | -0.0386 | -0.0833 |        |      |      |
| GR                                 | Gexamethasone          | -0.1407 | -0.1531  | -0.1478 | -0.1221 | -0.8654 | -0.6014 | -0.8392 | -0.7191 | -0.8717 | -0.9625 | -0.7979 | -0.8034 |        |      |      |
| GSK-3                              | GSK-3 inhibitor II     | 0.0507  | 0.0902   | 0.0975  | 0.1219  | -0.2172 | -0.0486 | -0.1833 | -0.2594 | -0.0655 | -0.0584 | -0.1494 | -0.3610 |        |      |      |
| HDAC                               | Scriptaid              | 0.0852  | 0.0283   | -0.8486 | -1.9871 | -0.1155 | 0.6172  | -0.1639 | -1.5237 | 0.0066  | 0.4282  | -1.0787 | -1.9615 |        |      |      |
| HDAC                               | Trichostatin A         | -0.3432 | -1.8498  | -1.9505 | -1.9496 | 0.3766  | -1.7760 | -1.9246 | -1.9579 | 0.3596  | -1.8763 | -2.1210 | -2.0386 |        |      |      |
| HER2 (erbB2/neu), EGFR             | AG825                  | 0.0318  | 0.0642   | 0.0802  | 0.1028  | -0.2959 | 0.0388  | -0.0704 | -0.0850 | -0.1323 | 0.0115  | -0.1336 | -0.1139 |        |      |      |
| protein synthesis                  | Cycloheximide          | 0.0052  | -0.2613  | -0.8792 | -1.5443 | -0.1861 | -0.0486 | -0.4102 | -0.6175 | -0.1017 | -0.0249 | -0.8358 | -1.2202 |        |      |      |
| HMG-CoA reductase                  | Lovastatin             | 0.0355  | 0.0660   | 0.0132  | -0.0779 | -0.1448 | 0.0191  | -0.0306 | -0.3326 | -0.1461 | -0.0271 | -0.1488 | -0.5893 |        |      |      |
| HSP90                              | Radicalc               | 0.1053  | -0.9222  | -2.0754 | -2.0977 | 0.7348  | -0.1538 | -1.4686 | -2.0175 | 0.1256  | -0.1457 | -2.1506 | -2.2253 |        |      |      |
| HSP90                              | 17-AGG                 | 0.0753  | 0.0842   | -1.9309 | -2.0166 | -0.1450 | 0.9454  | -1.1013 | -1.8958 | 0.0900  | 0.1117  | -0.9718 | -2.0737 |        |      |      |
| IGF-1R                             | AG1024                 | 0.0771  | 0.0713   | 0.1057  | 0.0977  | -0.1698 | 0.0438  | -0.0034 | 0.1080  | -0.1208 | 0.0074  | -0.0403 | 0.0759  |        |      |      |
| INOS                               | 1400W, HCl             | 0.0273  | 0.0704   | -0.0077 | -0.0704 | -0.1438 | 0.0515  | -0.3103 | -0.4317 | -0.0533 | -0.0085 | -0.2663 | -0.2563 |        |      |      |
| INOS                               | AMT, HCl               | 0.0455  | 0.0872   | 0.0854  | 0.1138  | -0.1434 | -0.0054 | -0.0334 | -0.1344 | -0.1117 | 0.0208  | -0.1119 | -0.0586 |        |      |      |
| Jak-2                              | AG490                  | 0.0446  | 0.0655   | -0.0377 | -0.1280 | -0.2527 | 0.0554  | -0.1724 | -0.5417 | -0.1256 | -0.0098 | -0.3718 | -0.5332 |        |      |      |
| Jak-2                              | Cucurbitacin I         | -0.2720 | -0.7371  | -1.0049 | -1.9106 | -0.6367 | -0.8447 | -0.6387 | -1.2748 | -0.3775 | -0.8729 | -1.2849 | -1.9615 |        |      |      |
| JNK                                | SP600125               | 0.0541  | 0.0790   | 0.0358  | 0.0627  | -0.1242 | 0.0401  | 0.0768  | 0.0899  | -0.0581 | -0.0330 | -0.0873 | -0.0840 |        |      |      |
| lck (p56), TYK                     | Damcanthal             | 0.0952  | 0.0766   | 0.1028  | 0.1254  | -0.1303 | 0.0039  | 0.0313  | -0.0966 | -0.0541 | 0.0002  | -0.1359 | -0.1939 |        |      |      |
| MEK                                | PD 98059               | 0.0828  | 0.1285   | 0.1006  | 0.1183  | -0.1664 | -0.0124 | -0.1489 | -0.3147 | -0.0899 | -0.0678 | -0.1877 | -0.2945 |        |      |      |
| MEK                                | U0126                  | 0.0903  | 0.1007   | 0.0773  | 0.0419  | -0.2138 | -0.0474 | -0.2814 | -0.5704 | -0.0669 | 0.0347  | -0.2353 | 0.5255  |        |      |      |
| methionine aminopeptidase          | Fumagillin             | -0.0343 | -0.0765  | -0.1194 | -0.1224 | -0.4281 | -0.3085 | -0.3618 | -0.4051 | -0.2862 | -0.3025 | -0.3253 | -0.2878 |        |      |      |
| MMP                                | GM 6001                | -0.0348 | 0.0850   | 0.0812  | 0.0921  | -0.2614 | 0.0181  | -0.0611 | -0.0729 | -0.0473 | -0.0351 | -0.1208 | -0.0379 |        |      |      |
| NF-kB                              | N-Acetyl-L-cysteine    | 0.0668  | 0.0663   | 0.0599  | 0.0889  | -0.1718 | -0.0777 | -0.1103 | -0.1209 | -0.0926 | 0.0490  | -0.1633 | -0.1310 |        |      |      |
| NOS                                | Aminoguanidine, HCl    | 0.0387  | 0.0635   | 0.0193  | 0.0536  | -0.2301 | -0.0798 | -0.0184 | -0.1462 | -0.0978 | -0.0063 | -0.2348 | -0.1655 |        |      |      |
| NOS                                | L-NMMA                 | 0.0495  | 0.0540   | 0.0660  | 0.0806  | -0.1651 | -0.0318 | -0.1182 | -0.0497 | -0.0425 | -0.0258 | -0.1927 | -0.1824 |        |      |      |
| p38 (MAPK)                         | PD169316               | 0.0675  | 0.0764   | 0.0232  | -0.0354 | -0.2008 | 0.1931  | 0.3772  | 0.4125  | -0.0873 | 0.2467  | 0.2642  | 0.1324  |        |      |      |
| p38 (MAPK)                         | SB 203580              | 0.0587  | 0.0907   | 0.0946  | 0.0585  | -0.1782 | 0.1422  | 0.2365  | 0.2297  | -0.0039 | 0.2265  | 0.2777  | 0.2372  |        |      |      |
| p70 S6K                            | Rapamycin              | -0.2964 | -0.3332  | -0.3120 | -0.3616 | 0.1615  | 0.3253  | 0.2562  | 0.0857  | 0.0891  | 0.1261  | 0.0210  | -0.0678 |        |      |      |
| PARP                               | NU1025                 | 0.0727  | 0.1108   | 0.1226  | 0.1115  | -0.1791 | 0.0041  | 0.0535  | -0.0196 | -0.0961 | -0.0279 | -0.1353 | 0.0164  |        |      |      |
| PARP-1                             | Benzamide              | -0.0291 | 0.0737   | 0.1092  | 0.1242  | -0.1846 | -0.0002 | -0.0802 | -0.0784 | -0.0191 | -0.0096 | -0.2207 | -0.0435 |        |      |      |
| PC-PLC                             | D609                   | 0.0606  | 0.0744   | 0.0749  | 0.0954  | -0.2801 | -0.0530 | 0.0043  | -0.0583 | -0.0779 | -0.0248 | -0.1301 | -0.0594 |        |      |      |
| PDE                                | IBMX                   | 0.0539  | 0.0730   | 0.0268  | 0.0176  | -0.2480 | -0.0014 | -0.1194 | -0.5833 | -0.1410 | -0.0336 | -0.4140 | -0.6920 |        |      |      |
| PDE (cAMP)                         | Ro-20-1724             | 0.0443  | 0.0269   | -0.1338 | -0.1385 | -0.1563 | -0.4161 | -1.2672 | -1.4384 | -0.1219 | -0.4376 | -1.0067 | -1.0593 |        |      |      |
| PDE (cGMP)                         | Zaprinast              | 0.1156  | 0.0895   | 0.0786  | 0.1032  | -0.1475 | -0.0039 | 0.0076  | -0.0528 | -0.1249 | -0.0050 | -0.1271 | -0.0702 |        |      |      |
| PDGFR                              | AG1296                 | 0.0296  | 0.1117</ |         |         |         |         |         |         |         |         |         |         |        |      |      |



| Target         | Compound                                        | WT      |                |                |                | F2004V  |         |                |                | F2075C  |                |                |                |
|----------------|-------------------------------------------------|---------|----------------|----------------|----------------|---------|---------|----------------|----------------|---------|----------------|----------------|----------------|
|                |                                                 | 10 nM   | 100 nM         | 1 μM           | 3 μM           | 10 nM   | 100 nM  | 1 μM           | 3 μM           | 10 nM   | 100 nM         | 1 μM           | 3 μM           |
| None (control) | DMSO                                            | 0       | 0              | 0              | 0              | 0       | 0       | 0              | 0              | 0       | 0              | 0              | 0              |
| AK             | ABT-702                                         | -0.1026 | -0.0031        | 0.0056         | -0.0320        | 0.0075  | 0.0419  | -0.0430        | -0.0487        | -0.0596 | 0.0741         | 0.0159         | 0.1826         |
| AKT            | Akt inhibitor IV                                | -0.0958 | -0.1004        | <b>-1.7464</b> | <b>-1.8433</b> | -0.0197 | 0.1939  | <b>-1.3819</b> | <b>-1.9142</b> | 0.0017  | 0.1155         | <b>-1.8918</b> | <b>-1.7145</b> |
| AKT            | Akt inhibitor VIII, Isozyme-Selective, Akti-1/2 | -0.0509 | 0.0396         | 0.0099         | -0.0425        | -0.0207 | 0.0700  | 0.2131         | 0.4659         | 0.0050  | 0.1291         | 0.0109         | 0.3529         |
| AKT            | Akt inhibitor XI                                | -0.0441 | 0.0492         | 0.0431         | 0.0461         | -0.0140 | -0.0327 | -0.0382        | 0.0600         | -0.0027 | 0.0853         | 0.1038         | 0.1588         |
| AMPK           | compound C                                      | 0.0169  | 0.0286         | 0.0044         | -0.0160        | -0.0058 | 0.0779  | 0.0234         | -0.0264        | 0.0371  | 0.1359         | 0.0955         | 0.2890         |
| ATM            | ATM/ATR kinase inhibitor                        | 0.0118  | 0.0534         | 0.0251         | 0.0186         | -0.0137 | 0.0092  | 0.0421         | 0.1508         | 0.0216  | 0.1356         | 0.0649         | 0.2611         |
| ATM            | ATM kinase inhibitor                            | -0.0245 | 0.0152         | -0.0036        | -0.0343        | -0.0109 | 0.0454  | 0.0232         | 0.0945         | -0.0226 | 0.0672         | 0.0277         | 0.0043         |
| Aurora         | Aurora kinase/cdk inhibitor                     | -0.0378 | -0.0871        | 0.0149         | -0.1080        | -0.0251 | -0.0318 | -0.1827        | -0.0640        | -0.0660 | 0.0334         | 0.1157         | 0.3038         |
| Aurora         | Aurora kinase inhibitor II                      | -0.2301 | -0.0026        | 0.0777         | 0.0971         | -0.0284 | -0.0178 | -0.1475        | -0.0173        | -0.0744 | 0.1093         | 0.1493         | 0.3810         |
| Aurora         | Aurora kinase inhibitor III                     | -0.2002 | 0.0076         | -0.3162        | <b>-1.7241</b> | -0.0931 | -0.0582 | 0.3981         | <b>-0.9365</b> | -0.0121 | 0.1274         | -0.3860        | <b>-1.4647</b> |
| Bcr-abl        | AG957                                           | -0.1290 | 0.0401         | 0.0719         | 0.0674         | -0.1239 | -0.0223 | -0.0878        | 0.0441         | 0.0096  | 0.0807         | 0.1752         | 0.1522         |
| BTK            | LFM-A13                                         | -0.1113 | 0.0433         | 0.0549         | 0.0583         | -0.0286 | -0.0233 | -0.0988        | -0.0179        | -0.0259 | 0.1246         | 0.1077         | 0.0560         |
| BTK            | Terreic acid                                    | -0.0520 | 0.0694         | 0.0136         | 0.0064         | -0.0513 | -0.0473 | 0.0520         | 0.0376         | 0.0134  | 0.1446         | 0.0683         | 0.1259         |
| CAMKII         | KN-93                                           | -0.0641 | 0.0603         | -0.0354        | -0.0684        | -0.0429 | -0.0284 | 0.0076         | 0.2676         | 0.0032  | 0.0988         | 0.0459         | 0.1608         |
| CAMKII         | KN-62                                           | -0.0424 | 0.0292         | -0.0434        | -0.1054        | -0.0321 | 0.0077  | -0.1486        | -0.3745        | 0.0685  | 0.0726         | -0.1356        | -0.3260        |
| CAMKII         | Lavendustin C                                   | -0.0749 | -0.0283        | 0.0455         | 0.0361         | -0.0863 | -0.0252 | -0.1034        | 0.0042         | -0.0278 | 0.0331         | 0.0531         | 0.0854         |
| CDK            | Kenpaullone                                     | -0.1350 | -0.0001        | -0.2492        | -0.5112        | -0.1200 | -0.0596 | -0.1907        | -0.0847        | -0.0636 | 0.0884         | 0.0464         | 0.2189         |
| CDK            | purvalanol A                                    | -0.0825 | 0.0331         | 0.0818         | -0.0487        | -0.0521 | 0.0061  | -0.1411        | -0.2487        | -0.0463 | 0.1018         | 0.0882         | 0.0471         |
| CDK            | Olomoucine                                      | -0.0750 | 0.0284         | 0.0856         | 0.0774         | -0.1269 | -0.0544 | -0.0521        | -0.0223        | -0.0073 | 0.0615         | 0.1548         | 0.1743         |
| CDK            | Alsterpaullone, 2-cyanoethyl                    | -0.0879 | -0.0283        | -1.0925        | <b>-1.6424</b> | -0.1087 | -0.1808 | -0.5323        | <b>-1.2411</b> | -0.0176 | 0.1185         | <b>-1.0164</b> | <b>-1.5335</b> |
| CDK            | Cdk1/2 inhibitor III                            | -0.0205 | 0.6079         | -1.7360        | <b>-1.8643</b> | -0.1375 | -0.5773 | -1.2344        | <b>-1.8107</b> | 0.0107  | 0.0742         | <b>-1.7766</b> | <b>-1.8194</b> |
| CDK            | Cdk2/9 inhibitor                                | -0.0286 | 0.1610         | <b>-1.7392</b> | <b>-1.9457</b> | -0.1131 | -0.0310 | -1.2558        | <b>-1.5474</b> | 0.0642  | 0.4724         | <b>-1.8352</b> | <b>-1.8617</b> |
| CDK            | NU6102                                          | -0.0331 | 0.0635         | 0.0080         | -0.1361        | -0.1455 | -0.0110 | -0.2379        | -0.4052        | 0.0209  | 0.0695         | -0.0216        | -0.0546        |
| CDK            | Cdk4 inhibitor                                  | -0.0480 | 0.0367         | -0.0038        | -0.0450        | -0.1034 | -0.0022 | -0.1063        | -0.0035        | -0.0415 | 0.0144         | -0.2829        | 0.0800         |
| CDK            | NSC625987                                       | -0.1867 | -0.0043        | 0.0659         | 0.0317         | -0.0749 | -0.0755 | -0.0567        | 0.0378         | -0.0701 | 0.0588         | 0.0820         | 0.0651         |
| Chk            | SB218078                                        | -0.1852 | <b>-1.1932</b> | <b>-1.5789</b> | <b>-1.6729</b> | 0.3673  | 0.5603  | <b>-1.1245</b> | <b>-1.5733</b> | 0.3128  | <b>-0.3083</b> | <b>-1.6251</b> | <b>-1.6315</b> |
| Chk            | isogranulatimide                                | -0.0865 | 0.0933         | 0.0679         | -0.1248        | -0.2080 | -0.0544 | -0.0147        | 0.0472         | -0.0792 | 0.0513         | 0.1450         | 0.0052         |
| Chk            | Chk2 inhibitor                                  | -0.0888 | 0.0792         | 0.0783         | 0.0217         | -0.1516 | -0.0503 | -0.0981        | -0.0105        | -0.0823 | 0.0535         | 0.1045         | 0.0351         |
| Chk            | Chk2 inhibitor II                               | -0.0258 | 0.1042         | 0.0695         | 0.0517         | -0.1681 | -0.0439 | -0.1252        | -0.0639        | -0.0737 | 0.0629         | 0.0539         | 0.0679         |
| CK             | Ellagic acid                                    | -0.0425 | 0.0957         | 0.0708         | 0.0591         | -0.1138 | -0.0686 | -0.0950        | -0.0235        | 0.0136  | 0.0509         | 0.0967         | 0.0471         |
| CK             | TBB                                             | -0.0229 | 0.0537         | 0.0221         | 0.0263         | -0.0209 | -0.0640 | -0.0893        | 0.0234         | 0.0061  | 0.0465         | 0.0715         | 0.0673         |
| CK             | DMAT                                            | -0.0122 | 0.0373         | 0.0750         | 0.0803         | -0.1002 | -0.0355 | -0.1299        | -0.2024        | -0.0531 | 0.0495         | 0.0559         | 0.0930         |
| CK             | D4476                                           | -0.0993 | 0.0679         | 0.1296         | 0.1221         | -0.0816 | -0.0896 | 0.0523         | 0.1498         | -0.1003 | 0.0212         | 0.1807         | -0.0102        |
| Clk            | TG003                                           | -0.0519 | 0.0595         | 0.0972         | 0.0730         | -0.1287 | -0.0340 | 0.0404         | 0.2394         | -0.0787 | 0.0385         | 0.1776         | 0.2066         |
| DGK            | Diacylglycerol kinase inhibitor II              | -0.0594 | 0.0891         | 0.1032         | 0.1061         | -0.1381 | -0.1014 | -0.0265        | 0.0466         | -0.0400 | 0.0320         | 0.0943         | 0.1005         |
| DNA-PK         | IC60211                                         | -0.0599 | 0.0751         | 0.0832         | 0.0929         | -0.0985 | -0.0949 | -0.0845        | 0.0048         | -0.0780 | 0.0269         | 0.1438         | 0.0567         |
| eEF2           | TX-1918                                         | -0.1619 | 0.1011         | 0.0625         | 0.0869         | -0.1298 | 0.0078  | 0.0083         | 0.1782         | -0.0320 | 0.0495         | 0.0939         | 0.2184         |
| EGFR           | BPIQ-II                                         | -0.0358 | 0.0793         | 0.0540         | 0.0489         | -0.1171 | -0.0441 | -0.1284        | 0.1552         | -0.0137 | 0.0532         | 0.0343         | 0.1652         |
| EGFR           | AG1478                                          | -0.0178 | 0.0626         | 0.0328         | 0.0018         | -0.0978 | -0.0432 | 0.0699         | 0.5568         | -0.0140 | 0.0385         | 0.1923         | 0.7000         |
| EGFR           | AG490                                           | -0.0730 | -0.0541        | 0.0132         | -0.1145        | -0.1096 | -0.0148 | -0.0981        | -0.2314        | -0.0686 | 0.0754         | 0.0067         | 0.0569         |
| FGFR           | SU4984                                          | -0.1614 | -0.0170        | 0.0942         | 0.0745         | -0.1569 | -0.1235 | -0.0311        | 0.1624         | -0.0704 | 0.0628         | 0.1082         | 0.1589         |
| FGFR           | SU5402                                          | -0.1019 | 0.0469         | 0.0805         | 0.0810         | -0.1924 | -0.0685 | -0.0471        | -0.0412        | -0.0824 | 0.0291         | 0.0977         | -0.0167        |
| Flt-3          | Flt-3 Inhibitor                                 | -0.1062 | 0.0378         | 0.0573         | -0.0066        | -0.1604 | -0.1276 | 0.0308         | 0.2670         | -0.0670 | 0.0087         | 0.1590         | 0.4277         |
| Fms            | cFMS Receptor Tyrosine Kinase Inhibitor         | -0.1151 | 0.0483         | 0.0738         | -0.0655        | -0.1630 | -0.0716 | -0.0023        | 0.1918         | -0.0687 | 0.0181         | 0.1198         | 0.1097         |
| Fyn            | SU6656                                          | -0.0302 | 0.1041         | 0.0427         | <b>-1.5867</b> | -0.0892 | -0.0077 | 0.2357         | 0.2625         | -0.0198 | 0.1300         | 0.3352         | <b>-0.9020</b> |
| GSK            | GSK-3 inhibitor IX                              | -0.0462 | 0.0817         | -0.1805        | -1.0627        | -0.1874 | -0.0928 | -0.2633        | -0.3411        | -0.0239 | 0.0548         | -0.0308        | -0.4191        |
| GSK            | 1-Azakenpaullone                                | -0.0303 | 0.0524         | <b>-0.3896</b> | <b>-1.0016</b> | -0.1014 | -0.0861 | -0.2093        | -0.2546        | -0.0138 | 0.0312         | -0.0526        | -0.2834        |
| GSK            | indirubin-3'-monoxime                           | -0.0877 | 0.0123         | 0.0358         | -0.4560        | -0.0681 | -0.0458 | -0.1410        | -0.1369        | -0.0402 | 0.0270         | 0.0186         | -0.1410        |
| HER2           | AG825                                           | -0.0395 | -0.0118        | 0.0700         | 0.0567         | -0.1597 | -0.1611 | -0.0536        | 0.0094         | -0.0828 | 0.0503         | 0.0913         | 0.1199         |
| IGF-1R         | AG1024                                          | -0.0033 | 0.0516         | 0.1047         | 0.0882         | -0.1535 | -0.1052 | -0.0199        | 0.1566         | -0.1194 | 0.0057         | 0.1074         | 0.2066         |
| IGF-1R         | AGL 2263                                        | -0.0242 | 0.0464         | 0.1079         | 0.0966         | -0.2281 | -0.1061 | -0.0721        | -0.0297        | -0.1076 | 0.0042         | 0.1044         | 0.0554         |
| IKK            | BMS-345541                                      | -0.0080 | 0.0755         | 0.0927         | <b>-1.2247</b> | -0.2456 | -0.1612 | 0.0345         | -0.3027        | -0.0828 | 0.0323         | 0.3092         | -0.4717        |
| IKK            | IKK-2 inhibitor VI                              | -0.0140 | 0.0278         | <b>-1.2607</b> | <b>-1.2810</b> | -0.2118 | -0.1622 | -0.2272        | <b>-0.7127</b> | -0.0830 | -0.0249        | <b>-0.7520</b> | <b>-1.1386</b> |
| IRAK           | IRAK-1/4 inhibitor                              | -0.0104 | 0.0826         | 0.0389         | 0.0397         | -0.2147 | -0.0795 | -0.3001        | 0.0423         | -0.0382 | 0.0732         | 0.0591         | 0.2137         |
| Jak            | JAK Inhibitor I                                 | -0.0022 | -0.0025        | -0.3098        | <b>-0.6726</b> | -0.1593 | -0.0511 | 0.3038         | 0.2188         | -0.0497 | 0.0628         | 0.0510         | 0.2592         |
| Jak            | JAK3 Inhibitor VI                               | -0.1709 | -0.1286        | <b>-1.0418</b> | <b>-1.8982</b> | -0.0642 | -0.2133 | <b>-1.3270</b> | <b>-1.7914</b> | -0.0146 | -0.0348        | <b>-0.6433</b> | <b>-1.8434</b> |
| JNK            | SP600125                                        | -0.1506 | 0.0111         | 0.0496         | 0.0370         | -0.1724 | -0.0379 | -0.0174        | 0.1481         | -0.0572 | 0.0374         | 0.0930         | 0.2097         |
| JNK            | JNK inhibitor VIII                              | -0.0594 | 0.0274         | 0.0927         | 0.1140         | -0.0791 | -0.0501 | 0.0079         | 0.1809         | -0.0489 | 0.0594         | 0.1293         | 0.4469         |
| Lck            | Damnacanthal                                    | -0.0650 | 0.0745         | 0.0838         | 0.0858         | -0.1666 | -0.0720 | -0.1094        | -0.0279        | -0.0607 | 0.0204         | 0.0783         | 0.0203         |
| Lck            | PP2                                             | -0.0704 | 0.0665         | -0.0661        | -0.4280        | -0.2023 | -0.0516 | -0.1871        | -0.2427        | -0.0726 | 0.0337         | 0.0380         | 0.0387         |
| MAPK           | ERK inhibitor II                                | -0.0533 | 0.0917         | 0.0598         | 0.0778         | -0.2182 | -0.1380 | -0.0235        | 0.1715         | -0.0495 | 0.0706         | 0.1585         | 0.3617         |
| MEK            | PD98059                                         | -0.0459 | 0.0775         | 0.0076         | -0.0781        | -0.1787 | -0.1178 | -0.1846        | -0.2992        | -0.0375 | 0.0348         | 0.0219         | -0.1059        |
| MEK            | U-0126                                          | -0.0319 | 0.0516         | -0.0918        | -0.2531        | -0.1608 | -0.0375 | -0.3502        | -0.5884        | -0.0184 | -0.0138        | -0.0869        | -0.1623        |
| MEK            | MEK inhibitor I                                 | -0.2809 | 0.0059         | -0.0285        | -0.0298        | -0.0899 | -0.0447 | -0.0909        | -0.0009        | -0.0506 | 0.0603         | 0.1005         | 0.1454         |
| Met            | SU11274                                         | -0.0669 | 0.0577         | 0.0198         | <b>-0.4994</b> | -0.1413 | -0.0360 | 0.4130         | 0.5135         | -0.0583 | 0.0849         | 0.1772         | 0.1084         |
| MLCK           | ML-7                                            | -0.0755 | 0.0650         | 0.0826         | 0.0870         | -0.1727 | -0.1364 | -0.0900        | -0.0086        | -0.0540 | 0.0148         | 0.0502         | 0.0583         |
| p38            | SB202190                                        | -0.1361 | 0.0782         | 0.0773         | 0.0424         | -0.1049 | 0.0283  | 0.1880         | 0.3110         | -0.0339 | 0.2950         | 0.2558         | 0.6553         |
| p38            | SB239063                                        | -0.1327 | 0.1095         | 0.0729         | 0.0570         | -0.0982 | 0.0427  | 0.0626         | 0.2246         | -0.0428 | 0.3003         | 0.2507         | 0.5753         |
| PDGFR          | AG1296                                          | -0.0824 | 0.0982         | 0.0552         | 0.0711         | -0.2119 | -0.0886 | -0.0359        | 0.0177         | -0.0419 | 0.0624         | 0.1246         | 0.0506         |
| PDGFR          | SU11652                                         | -0.0057 | 0.1064         | -0.5635        | <b>-1.6833</b> | -0.1933 | 0.1172  | 0              |                |         |                |                |                |

| Target                   | Compound                     | WT      |         |         |         | F2004V  |         |         |         | F2075C  |         |         |         |
|--------------------------|------------------------------|---------|---------|---------|---------|---------|---------|---------|---------|---------|---------|---------|---------|
|                          |                              | 10 nM   | 100 nM  | 1 μM    | 3 μM    | 10 nM   | 100 nM  | 1 μM    | 3 μM    | 10 nM   | 100 nM  | 1 μM    | 3 μM    |
| None (control)           | DMSO                         | 0       | 0       | 0       | 0       | 0       | 0       | 0       | 0       | 0       | 0       | 0       | 0       |
| ALK                      | ceritinib                    | -0.1955 | -1.4999 | -2.4379 | -2.5039 | 0.6010  | -0.6357 | -2.2133 | -2.3622 | 0.8743  | -1.0651 | -2.1863 | -2.2583 |
| ALK                      | ASP3026                      | -0.0839 | -0.5690 | -2.1589 | -2.4798 | 0.2238  | 0.7355  | -1.4116 | -2.2239 | 0.3761  | 0.7332  | -1.8698 | -2.1951 |
| ALK                      | TAE684                       | -0.3981 | -0.6115 | -2.3406 | -2.4481 | 0.6800  | 0.0375  | -2.1361 | -2.3845 | 0.8396  | -0.0699 | -2.1186 | -2.2231 |
| IGF1R                    | AEW541                       | 0.0592  | 0.0471  | -0.0664 | -2.4352 | 0.0690  | 0.0414  | -0.9236 | -2.2741 | 0.0529  | -0.0610 | -2.4416 | -2.1818 |
| ALK                      | AP26113-analog               | -0.1584 | -0.1520 | -0.4448 | -2.4547 | 0.6198  | 0.7564  | -2.1068 | -2.3308 | 0.9066  | 0.8322  | -2.0562 | -2.2136 |
| ALK/MET/VEGFR/RET        | cabozantinib                 | -0.7475 | -1.8916 | -2.0951 | -2.3713 | 0.5965  | -0.8606 | -1.9413 | -2.1934 | 0.6402  | -0.7312 | -2.0050 | -2.2136 |
| VEGFR                    | E7080                        | -0.0037 | -0.0298 | -0.0421 | -0.0952 | 0.0131  | 0.1136  | 0.1993  | 0.2661  | 0.0393  | 0.0516  | 0.0221  | 0.1505  |
| Bcr-Abl                  | nilotinib                    | 0.0897  | 0.0665  | 0.0512  | -0.0451 | -0.0751 | 0.1338  | 0.3573  | 0.0959  | 0.0608  | 0.1115  | 0.3010  | -0.0430 |
| BRAF/KIT/VEGFR/PDGFR     | sorafenib                    | 0.0099  | 0.0087  | 0.0438  | -0.2323 | 0.0359  | 0.2307  | 0.4792  | 0.2969  | 0.0252  | 0.2330  | 0.5720  | 0.6433  |
| mTOR                     | temsirolimus                 | -0.3173 | -0.3581 | -0.3840 | -0.4008 | 0.0072  | -0.0393 | 0.0175  | -0.1028 | 0.2699  | 0.1918  | 0.2285  | 0.0990  |
| EGFR/Her2                | lapatinib                    | 0.0510  | 0.0365  | 0.0636  | 0.0501  | 0.0062  | 0.0317  | 0.0482  | -0.1677 | 0.0083  | -0.0009 | 0.0464  | 0.0623  |
| Bcr-Abl/KIT              | imatinib mesylate            | 0.0148  | 0.0463  | 0.0647  | 0.0272  | 0.0293  | 0.0563  | 0.1302  | 0.1930  | -0.0019 | -0.0720 | 0.0862  | 0.1037  |
| RET/KIT/VEGFR/PDGFR      | sunitinib malate             | 0.0772  | -0.0637 | -0.4547 | -2.2425 | -0.0331 | 0.1265  | 0.4036  | -1.5859 | -0.0110 | -0.1632 | 0.5275  | 0.0065  |
| EGFR                     | gefitinib                    | 0.0576  | -0.0580 | -0.0477 | -0.1158 | -0.0073 | 0.0296  | -0.0997 | -0.2765 | -0.0438 | -0.0826 | -0.1994 | -0.6257 |
| HDAC                     | vorinostat                   | 0.0140  | -0.0365 | -0.3187 | -1.6599 | 0.0368  | 0.1053  | -0.0675 | -1.7138 | 0.0116  | 0.1376  | 0.1234  | -1.1956 |
| EGFR                     | erlotinib                    | 0.0752  | 0.0831  | 0.0438  | 0.0301  | -0.0024 | -0.0044 | 0.1237  | 0.2422  | -0.0275 | -0.0052 | 0.3020  | 0.3668  |
| Proteasome               | bortezomib                   | -1.9879 | -2.0474 | -2.1756 | -2.2452 | -1.8432 | -1.8450 | -1.9914 | -2.0892 | -1.7321 | -1.8971 | -1.9914 | -2.0071 |
| Bcr-Abl/Src              | dasatinib                    | 0.1333  | 0.0471  | -0.4649 | -0.6529 | -0.0134 | -0.1139 | -0.7941 | -0.7611 | -0.0551 | -0.3906 | -1.1133 | -1.6011 |
| mTOR                     | everolimus                   | -0.2093 | -0.2999 | -0.3762 | -0.3980 | 0.0555  | -0.0420 | -0.0028 | -0.1411 | 0.2849  | 0.1318  | 0.1958  | 0.0867  |
| FGFR/KIT/VEGFR/PDGFR     | pazopanib                    | 0.1084  | 0.0944  | -0.3346 | -1.0261 | 0.0279  | 0.0911  | 0.7003  | 0.1910  | 0.0017  | 0.0971  | 0.9402  | 0.3486  |
| Rho/SRF                  | CCG-1423                     | 0.1617  | 0.0699  | 0.0913  | 0.0699  | -0.0019 | 0.0128  | 0.0248  | 0.0558  | -0.0205 | -0.0743 | 0.0106  | 0.0147  |
| PIM                      | PIM1/2 Kinase Inhibitor V    | 0.0941  | 0.0014  | 0.0302  | 0.0397  | 0.0245  | 0.0243  | -0.0104 | 0.0217  | -0.0201 | -0.0745 | 0.0306  | 0.0940  |
| PIM                      | PIM1 Inhibitor II            | 0.0710  | 0.0002  | 0.0523  | 0.0356  | -0.0166 | 0.0338  | 0.0347  | -0.0455 | -0.0189 | -0.0114 | 0.0425  | 0.0472  |
| Hedgehog                 | AY 9944                      | 0.1363  | 0.1170  | 0.0731  | 0.0520  | -0.0243 | -0.0227 | -0.0629 | -0.2532 | -0.0367 | -0.0920 | -0.0170 | -0.1474 |
| Hedgehog                 | cyclopamine                  | 0.1804  | 0.1171  | 0.0988  | 0.0709  | 0.0155  | 0.0117  | 0.0781  | 0.0692  | -0.0490 | -0.0540 | 0.0351  | -0.0091 |
| Hedgehog                 | Jervine                      | 0.0877  | 0.1658  | 0.1135  | 0.0920  | 0.0066  | -0.0217 | 0.1225  | 0.0235  | -0.0270 | -0.0747 | 0.0269  | 0.0154  |
| STAT3                    | WP1066                       | 0.1616  | 0.1448  | 0.0357  | -0.5824 | -0.0097 | -0.0173 | -0.0329 | -0.5717 | -0.0834 | -0.0699 | 0.1943  | -0.2797 |
| STAT3                    | 5,15-DPP                     | 0.1710  | 0.1430  | 0.1060  | 0.0806  | 0.0108  | -0.0146 | 0.1071  | 0.0534  | -0.0430 | -0.1093 | 0.0566  | -0.0051 |
| Wnt                      | IWP-2                        | 0.1641  | 0.1082  | 0.0889  | 0.0691  | -0.0167 | 0.0174  | 0.0950  | 0.0532  | -0.0594 | -0.0204 | 0.0562  | 0.0108  |
| Wnt                      | IWR-1-endo                   | 0.0563  | 0.0445  | 0.0166  | -0.0262 | 0.0369  | 0.0232  | 0.0246  | 0.0363  | -0.0411 | -0.0780 | 0.0845  | 0.1970  |
| Wnt                      | FH535                        | 0.0505  | 0.0071  | 0.0573  | 0.0349  | -0.0298 | 0.0986  | 0.0667  | 0.0119  | -0.0478 | -0.0933 | 0.0197  | 0.0593  |
| Notch                    | DAPT                         | 0.1086  | 0.1283  | 0.0990  | 0.0951  | -0.0009 | 0.0158  | 0.0535  | -0.0017 | -0.0477 | -0.1314 | -0.0445 | -0.0711 |
| tankyrase-selective PARP | XAV939                       | 0.1662  | 0.1392  | 0.1322  | 0.1263  | -0.0493 | 0.0940  | 0.0926  | 0.0437  | -0.1205 | -0.1328 | 0.0385  | 0.0661  |
| pan-PARP                 | PJ-34                        | 0.1577  | 0.1585  | 0.1096  | 0.0806  | 0.0425  | -0.0152 | 0.0382  | 0.0211  | -0.0963 | -0.1558 | 0.0156  | 0.0408  |
| PARP-1/2-selective       | Olaparib                     | 0.1359  | 0.1413  | -0.0073 | -0.4014 | 0.0070  | -0.0611 | -0.0254 | -0.6724 | -0.0856 | -0.1410 | 0.1002  | -0.2553 |
| antipsychotic drug       | chlorpromazine hydrochloride | 0.1588  | 0.1508  | 0.1156  | 0.0999  | 0.0330  | -0.0630 | 0.0487  | -0.1171 | -0.0748 | -0.1728 | 0.0053  | 0.0215  |
| depression treatment     | desipramine hydrochloride    | 0.1672  | 0.1238  | 0.0985  | 0.0763  | -0.0193 | -0.0518 | 0.0345  | 0.0669  | -0.0847 | -0.1377 | 0.0170  | 0.1167  |
| golgii inhibitor         | brefeldin A                  | 0.1141  | 0.0607  | -0.0280 | -2.1888 | 0.0581  | -0.0001 | -0.4521 | -2.0892 | -0.0797 | -0.1965 | -0.5715 | -2.0634 |
| stress inducer           | anisomycin                   | 0.0313  | -1.2519 | -1.7417 | -2.0716 | 0.0444  | -1.6173 | -1.0112 | -1.4116 | 0.0214  | -1.2895 | -0.6300 | -0.9195 |
| thalidomide family       | thalidomide                  | 0.1024  | 0.0878  | 0.1090  | 0.0922  | 0.0467  | 0.0137  | 0.0711  | -0.0203 | -0.0061 | -0.0321 | 0.0191  | 0.0091  |
| thalidomide family       | lenalidomide                 | 0.0815  | 0.0717  | 0.1403  | 0.1272  | 0.0267  | 0.0192  | 0.1025  | 0.0211  | -0.0190 | -0.1180 | 0.0516  | -0.0113 |
| retinoids                | tretinoin                    | 0.0672  | 0.0594  | -0.0040 | -0.1072 | -0.0858 | -0.1922 | -0.3134 | -0.5945 | -0.2954 | -0.4003 | -0.4511 | -0.4932 |
| retinoids                | tamibarotene                 | 0.0484  | 0.0771  | 0.0810  | 0.0845  | -0.0734 | -0.1172 | 0.0021  | -0.0661 | -0.2473 | -0.3861 | -0.3209 | -0.3080 |
| DNA alkylation           | temozolomide                 | 0.0771  | 0.1165  | 0.1149  | 0.1182  | 0.0322  | -0.0401 | 0.0094  | -0.0094 | -0.0099 | -0.0964 | 0.0107  | 0.1017  |
| EML4-ALK                 | crizotinib                   | -0.5117 | -1.4339 | -1.9790 | -2.0851 | 0.5816  | -0.9702 | -1.9082 | -2.0558 | 0.9290  | -0.9053 | -1.8382 | -1.9815 |
| mTOR                     | Torikinib                    | 0.1052  | 0.0104  | -0.6637 | -1.8917 | 0.0196  | 0.0603  | -0.3196 | -1.5733 | -0.0482 | -0.0433 | -0.0942 | -1.4162 |
| lipase                   | orlistat                     | 0.0431  | 0.0232  | 0.0436  | 0.0139  | 0.0277  | 0.0474  | 0.0413  | -0.0574 | -0.0574 | -0.1173 | -0.0057 | 0.0224  |
| AR                       | MDV3100                      | 0.1397  | 0.1002  | 0.1040  | 0.0810  | -0.0380 | 0.0158  | 0.0829  | -0.0314 | -0.0568 | -0.1027 | 0.0735  | 0.0326  |
| caspace activator        | PAC-1                        | 0.1000  | 0.1053  | 0.0659  | -0.3860 | -0.0345 | 0.0186  | -0.2168 | -0.8533 | -0.0865 | -0.1028 | 0.4392  | -0.8170 |
| btc-2                    | ABT-737                      | 0.1254  | 0.1258  | -0.0188 | -0.1876 | 0.0246  | -0.0224 | -0.1247 | -0.3598 | -0.0766 | -0.1208 | 0.0771  | 0.0121  |
| G9a                      | UNC0638                      | 0.1204  | 0.1274  | -0.7301 | -2.0832 | 0.0796  | 0.0913  | -1.3870 | -2.0400 | 0.2234  | 0.2807  | 0.0515  | -2.0344 |
| G9a                      | BIX01294                     | 0.1019  | 0.1484  | -1.1222 | -2.0484 | 0.0165  | 0.0587  | -1.5512 | -2.0247 | -0.0389 | 0.0398  | -0.3857 | -1.9625 |
| LSD1                     | S2101 (LSD1 inhibitor II)    | 0.1446  | 0.0900  | 0.0916  | 0.0859  | 0.0070  | -0.0496 | 0.0027  | -0.1483 | -0.0938 | -0.0987 | -0.0804 | -0.0765 |
| PRMT1                    | AMI-1                        | 0.1180  | 0.0250  | 0.0467  | 0.0358  | 0.0449  | 0.0157  | -0.0096 | -0.0687 | -0.0550 | -0.0567 | 0.0021  | 0.0610  |
| p300                     | C646                         | 0.1005  | 0.0424  | 0.0542  | 0.0286  | -0.0488 | 0.0355  | -0.0075 | -0.0549 | -0.0192 | -0.0582 | 0.0177  | 0.0647  |
| SIRT1                    | SIRT1 inhibitor III          | 0.1418  | 0.1252  | 0.0835  | 0.0625  | -0.0309 | 0.0073  | 0.0906  | 0.0107  | -0.0668 | -0.0497 | 0.0436  | -0.0259 |
| SIRT1/2                  | Tenovin-6                    | 0.0876  | 0.1368  | -1.0231 | -2.1526 | 0.0443  | 0.0006  | -1.5530 | -2.0778 | -0.0764 | -0.1575 | -0.2127 | -2.0875 |
| HDAC8                    | PCI-34051                    | 0.1616  | 0.1570  | 0.1099  | 0.0374  | 0.0119  | -0.0387 | 0.0363  | -0.1274 | -0.0766 | -0.1172 | 0.0644  | -0.2538 |
| BRD4 bromodomain         | (+)-JQ1                      | 0.0932  | -0.4849 | -1.5069 | -1.9877 | 0.1442  | -0.4247 | -1.6832 | -1.9911 | 0.1288  | -0.0819 | -0.7092 | -1.4715 |
| Telomerase               | TMPYP4                       | 0.1505  | 0.1592  | 0.0994  | 0.0118  | 0.0659  | 0.0383  | 0.1024  | 0.0924  | -0.0544 | -0.0699 | 0.1937  | 0.1834  |
| PARP                     | BSI-201 (Niraparib)          | 0.1798  | 0.1212  | 0.0626  | 0.0282  | 0.0566  | -0.0179 | 0.1159  | 0.1519  | -0.0106 | -0.0561 | 0.1549  | 0.2587  |
| PARP                     | ABT-888 (Veliparib)          | 0.1184  | 0.0371  | 0.0031  | -0.0209 | 0.0061  | -0.0054 | -0.0054 | -0.0076 | -0.0777 | -0.0668 | 0.0129  | -0.0478 |
| PARP                     | AG014699 (Rucaparib)         | 0.0563  | -0.0176 | -0.2301 | -0.5583 | -0.0681 | -0.1177 | -0.4575 | -0.8909 | -0.0061 | -0.0969 | -0.1882 | -0.4288 |
| PARP                     | MK-4827 (Niraparib)          | 0.1243  | 0.0626  | -0.3455 | -1.1020 | 0.0121  | -0.0362 | -0.5232 | -1.4497 | -0.1238 | -0.1326 | -0.1457 | -0.6654 |
| Aurora                   | ENMD-2076                    | 0.1130  | 0.0984  | -1.4930 | -2.2232 | -0.0273 | 0.1839  | -0.1116 | -2.1009 | -0.0880 | 0.0260  | -0.0800 | -1.5449 |
| Aurora                   | MLN8237                      | 0.1048  | -0.3164 | -2.0838 | -2.1677 | 0.0397  | -0.3375 | -1.8027 | -1.9775 | -0.0264 | -0.1136 | -0.9002 | -1.4647 |
| Survivin                 | YM155                        | 0.0965  | 0.0285  | -2.0624 | -2.1706 | 0.0388  | -0.5400 | -1.9634 | -2.0722 | -0.0640 | -0.4773 | -1.7852 | -2.0221 |
| PDK1                     | OSU-03012                    | 0.1177  | 0.1344  | 0.1089  | 0.0931  | 0.0872  | 0.0508  | 0.0586  | 0.0132  | -0.0323 | -0.1523 | 0.0607  | -0.0216 |
| IGF-1R                   | OSI-906                      | 0.1313  | 0.0727  | 0.0132  | -0.0214 | -0.0037 | -0.0019 | -0.0530 | -0.1882 | -0.1014 | -0.0837 | 0.0677  | -0.1536 |
| c-Met                    | PF-04217903                  | 0.1070  | 0.0290  | 0.0187  | 0.0036  | 0.0763  | 0.0337  | 0.0438  | -0.0163 | -0.0583 | -0.0667 | 0.0599  | 0.0873  |
| DNMT                     | Decitabine                   | 0.0394  | -0.1196 | -0.806  |         |         |         |         |         |         |         |         |         |

**A**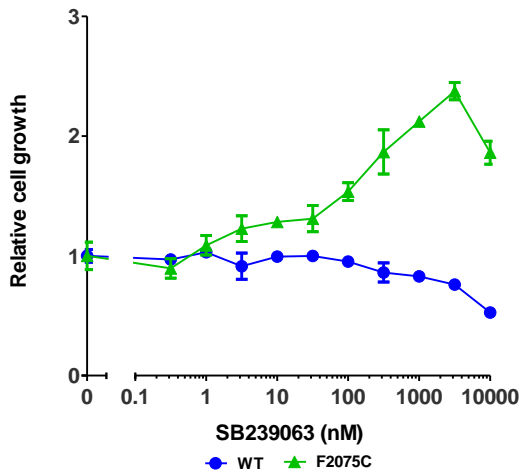**B**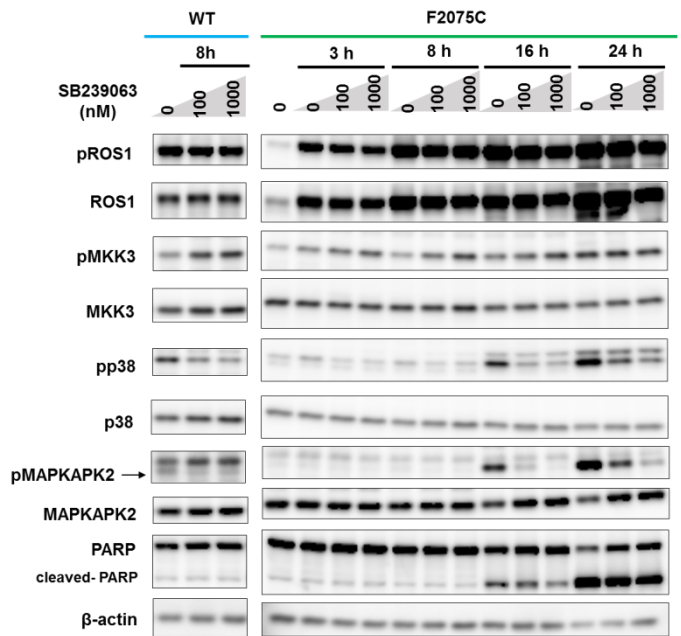

### Supplementary Figure S8. Rescue effect of p38 inhibitor (SB239063) on cells expressing F2075C-mutated CD74-ROS1.

(A) Sensitivity to SB239063 of wild-type (WT) or F2075C-mutated cells. Each cell line was treated with the indicated dose ranges of inhibitors for 72 h, then cell viability was measured by the CellTiter-Glo assay. Each value was normalised with the value from untreated cells.

(B) Immunoblot for WT or F2075C-mutated cells treated with SB239063. Cell lysates were immunoblotted to detect the indicated proteins.

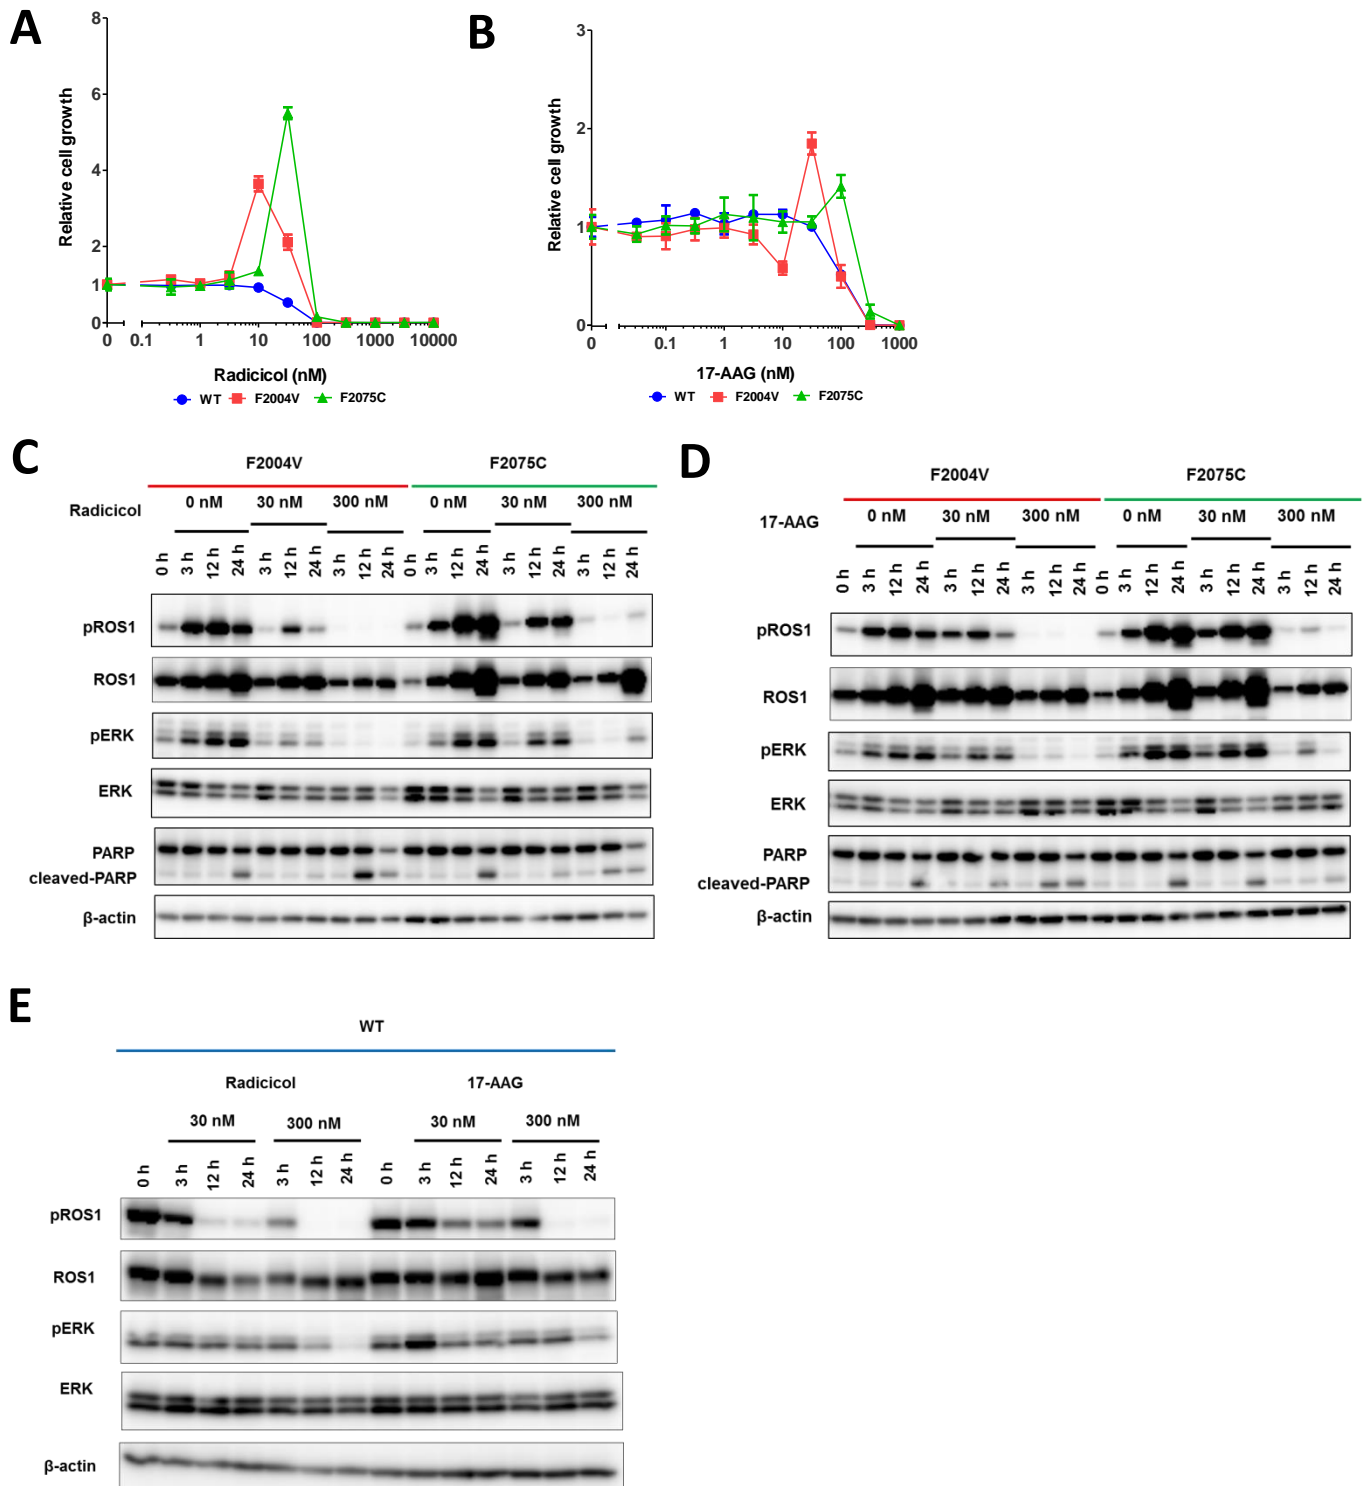

**Supplementary Figure S9. Rescue effect of Hsp90 inhibitors on cells expressing wild-type, F2004V- or F2075C-mutated CD74-ROS1.**

(A, B) Sensitivity to radicicol (A) or 17-AAG (B) of wild-type CD74-ROS1, F2004V- or F2075C-mutated cells. Each cell line was treated with the indicated dose ranges of inhibitors for 72 h, then cell viability was measured by the CellTiter-Glo assay. Each value was normalised with the value from untreated cells. (C-E) Immunoblots of F2004V- (C), F2075C (D)-mutated cells or wild-type CD74-ROS1 (E) cells treated with radicicol or 17-AAG. Cell lysates were immunoblotted to detect the indicated proteins.

**A**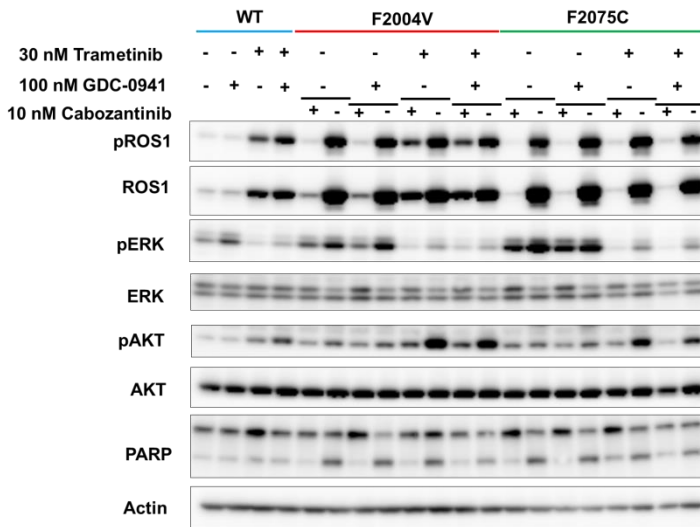**B**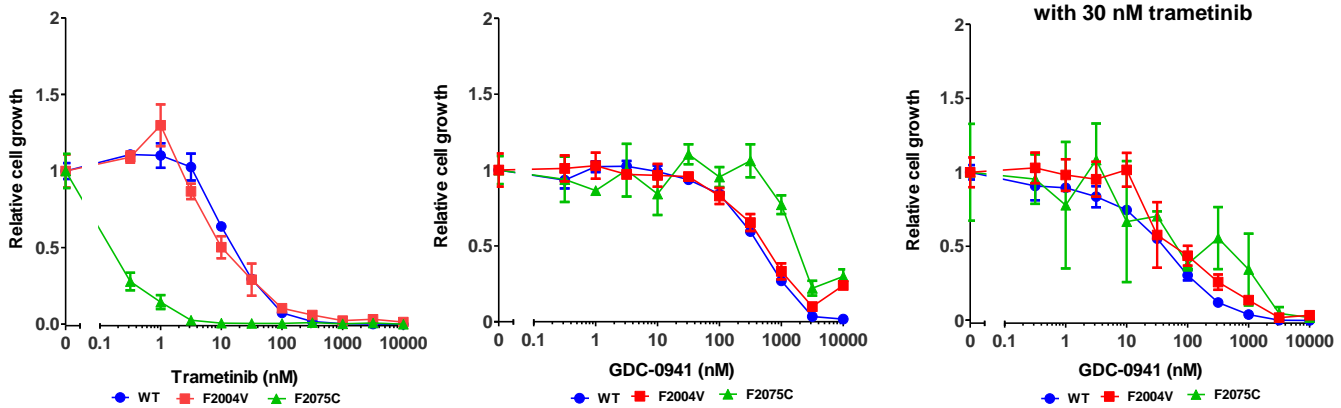

**Supplementary Figure S10. Rescue effect of MEK or PI3K inhibitors on cells expressing wild-type, F2004V- or F2075C-mutated CD74-ROS1.**

(A) Immunoblots of wild-type (WT) CD74-ROS1, F2004V- or F2075C-mutated cells treated with 30 nM of trametinib or 100 nM of GDC-0941 with or without 10 nM of cabozantinib for 24 h. Cell lysates were immunoblotted to detect the indicated proteins. (B) Sensitivity to trametinib (B, left), GDC-0941 (B, middle), or GDC-0941 with 30 nM of trametinib (B, right) of wild-type CD74-ROS1, F2004V- or F2075C-mutated cells. Each cell line was treated with the indicated dose ranges of inhibitors for 72 h, then cell viability was measured by the CellTiter-Glo assay. Each value was normalised with the value from untreated cells.

# Figure 2A

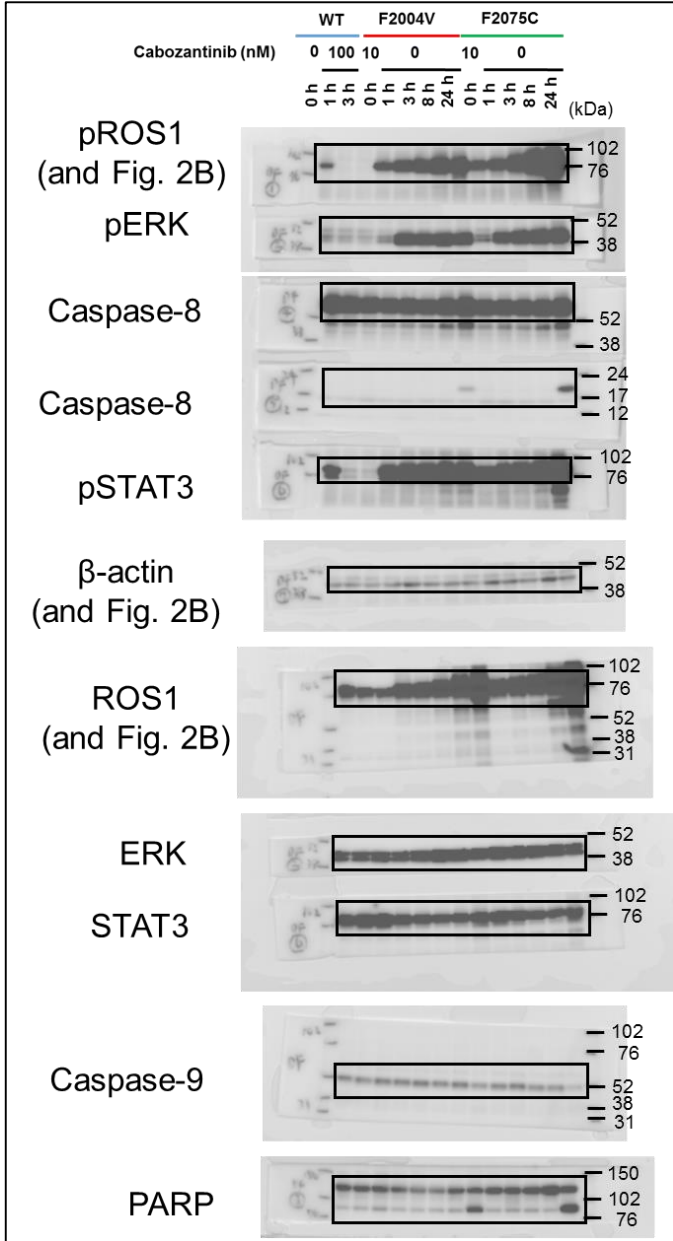

# Figure 2B

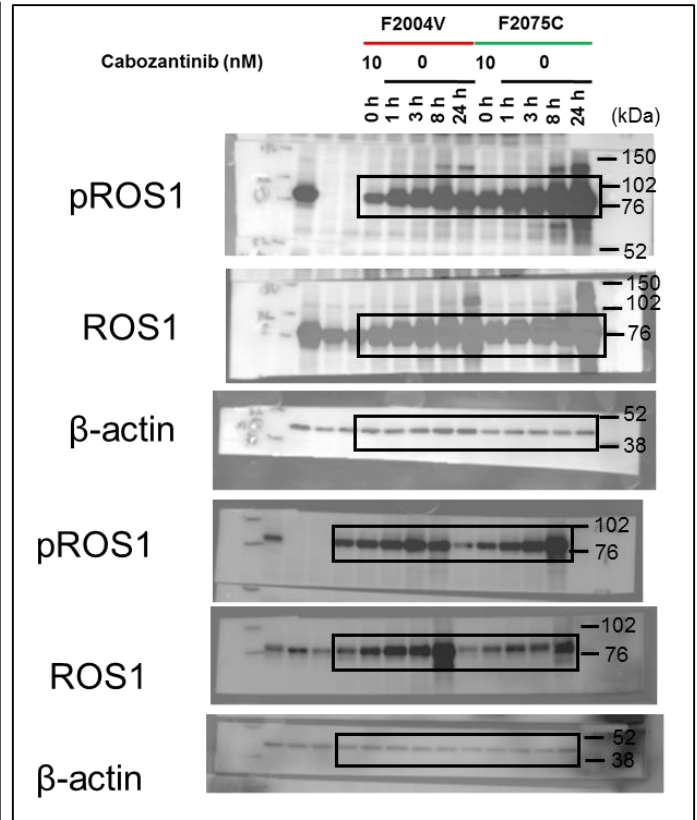

# Figure 2C

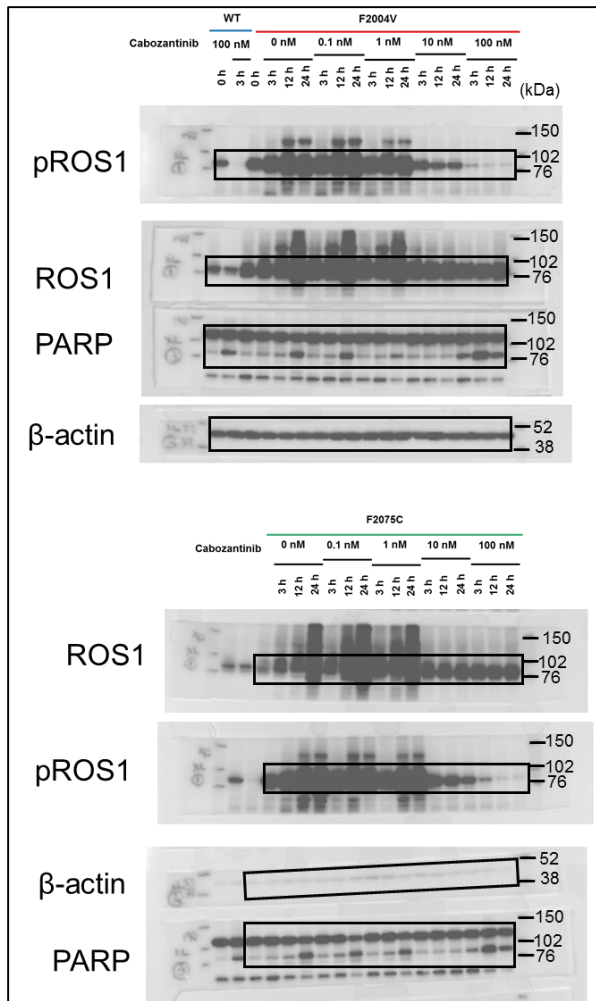

# Figure 3A

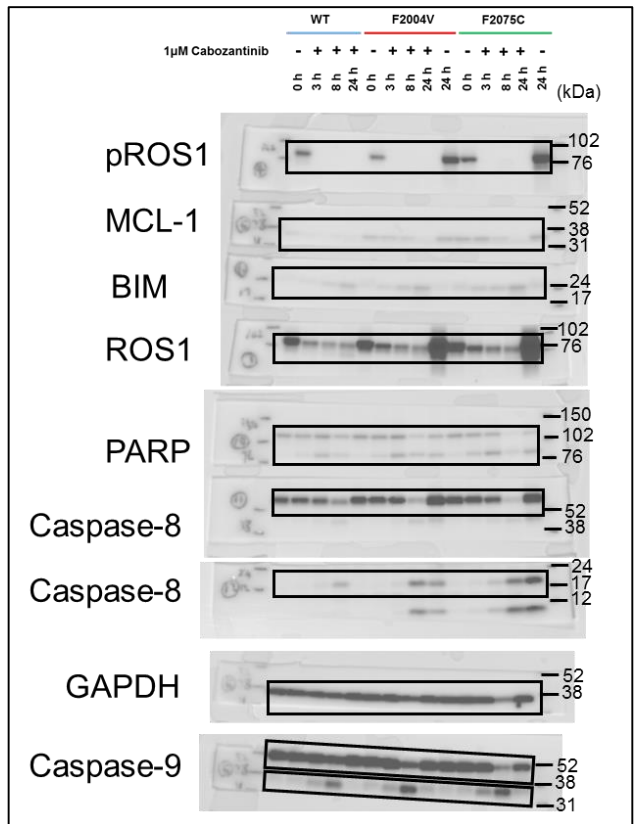

# Figure 5D

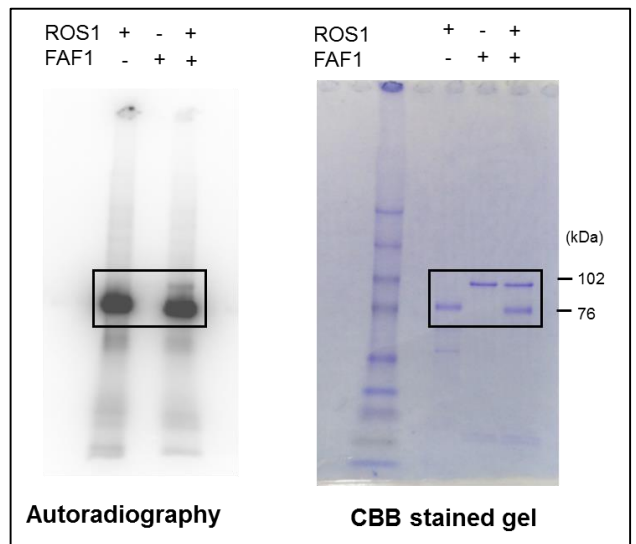

# Figure 7C

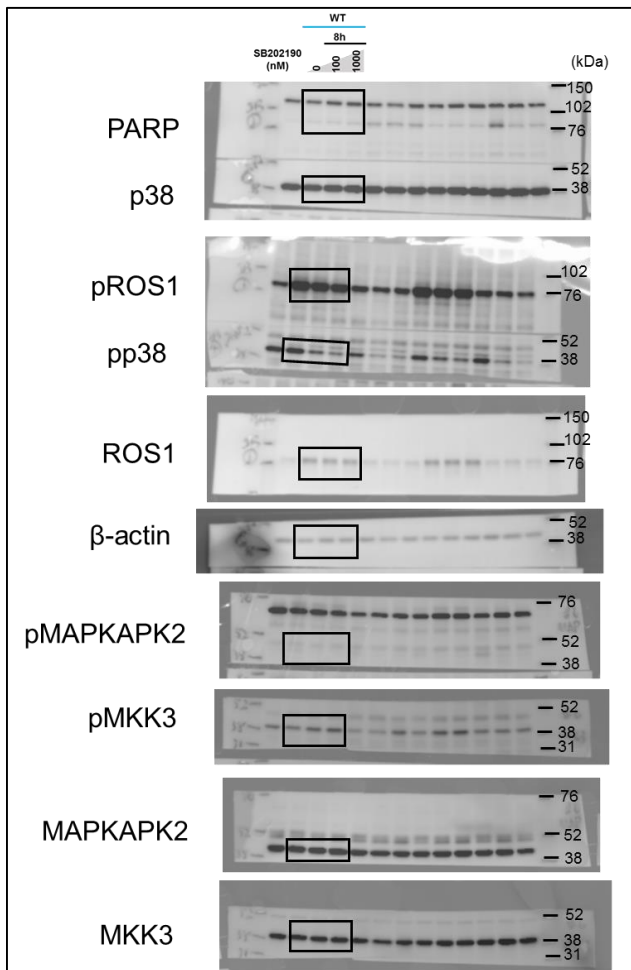

# Figure 7C

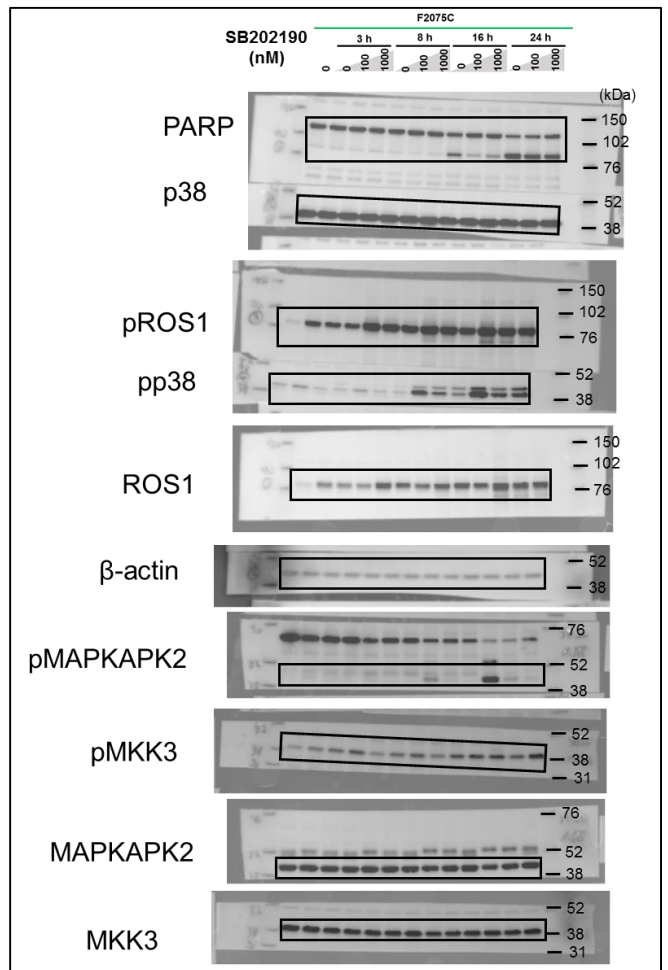



# Figure 7D

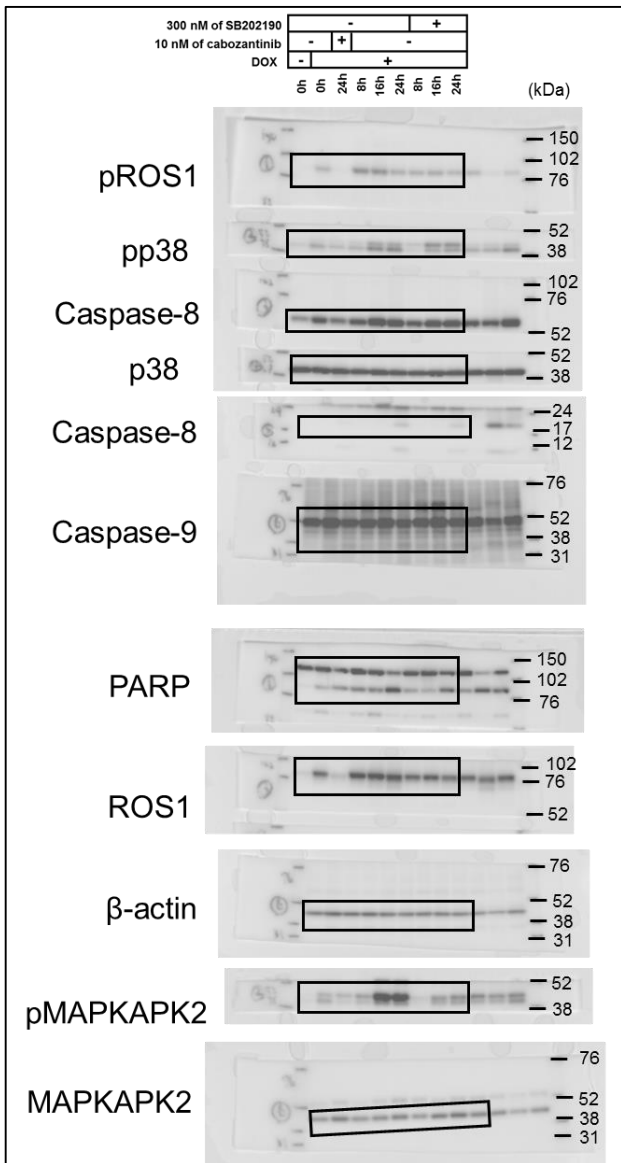

**A**

|       | WT_1h<br>(Untreated /<br>100 nM cabozantinib ) |      | F2004V_1h<br>(Cabozantinib removal<br>/10 nM cabozantinib) |      | F2004V_8h<br>(Cabozantinib removal<br>/10 nM cabozantinib) |      | F2075C_1h<br>(Cabozantinib removal<br>/10 nM cabozantinib) |      | F2075C_8h<br>(Cabozantinib removal<br>/10 nM cabozantinib) |      |
|-------|------------------------------------------------|------|------------------------------------------------------------|------|------------------------------------------------------------|------|------------------------------------------------------------|------|------------------------------------------------------------|------|
|       | count                                          | %    | count                                                      | %    | count                                                      | %    | count                                                      | %    | count                                                      | %    |
| pS    | 3504                                           | 87.2 | 3519                                                       | 87.3 | 3520                                                       | 87.3 | 3514                                                       | 87.2 | 3511                                                       | 87.3 |
| pT    | 407                                            | 10.1 | 406                                                        | 10.1 | 406                                                        | 10.1 | 406                                                        | 10.1 | 406                                                        | 10.1 |
| pY    | 108                                            | 2.7  | 107                                                        | 2.7  | 107                                                        | 2.7  | 108                                                        | 2.7  | 107                                                        | 2.7  |
| Total | 4019                                           | 100  | 4032                                                       | 100  | 4033                                                       | 100  | 4028                                                       | 100  | 4024                                                       | 100  |

**B**

|                      |       | WT_1h |      | F2004V_1h |      | F2004V_8h |      | F2075C_1h |      | F2075C_8h |      |
|----------------------|-------|-------|------|-----------|------|-----------|------|-----------|------|-----------|------|
|                      |       | count | %    | count     | %    | count     | %    | count     | %    | count     | %    |
| DOWN<br>< mean - 2SD | pS    | 95    | 91.3 | 83        | 85.6 | 29        | 76.3 | 72        | 87.8 | 29        | 85.3 |
|                      | pT    | 5     | 4.8  | 9         | 9.3  | 9         | 23.7 | 10        | 12.2 | 5         | 14.7 |
|                      | pY    | 4     | 3.8  | 5         | 5.2  | 0         | 0.0  | 0         | 0.0  | 0         | 0.0  |
|                      | Total | 104   | 100  | 97        | 100  | 38        | 100  | 82        | 100  | 34        | 100  |
| UP<br>> mean + 2SD   | pS    | 111   | 89.5 | 99        | 86.1 | 56        | 42.1 | 79        | 66.4 | 66        | 46.2 |
|                      | pT    | 8     | 6.5  | 10        | 8.7  | 3         | 2.3  | 7         | 5.9  | 6         | 4.2  |
|                      | pY    | 5     | 4.0  | 6         | 5.2  | 74        | 55.6 | 33        | 27.7 | 71        | 49.7 |
|                      | Total | 124   | 100  | 115       | 100  | 133       | 100  | 119       | 100  | 143       | 100  |

**Supplementary Table S1. Phosphopeptides identified by phosphoproteomic analysis of wild-type CD74-ROS1, F2004V- or F2075C-mutated cells under various cabozantinib treatment conditions.**

(A, B) Each value is shown as mean of two independent experiments . (A) Phosphorylation sites and distribution of each amino acid on phosphoproteomic analysis. (B) Significantly upregulated (>mean + 2 SD) and downregulated (<mean –2 SD) phosphorylation sites and distribution of each amino acid on phosphoproteomic analysis.
